# Supplementary material for: Monitoring multidimensional aspects of quality of life after cancer immunotherapy: protocol for the international multicentre, observational QUALITOP cohort study
Source: PubMed Central journal article supplement — BMJ Open. 2023 Apr 27;13(4):e069090. doi: 10.1136/bmjopen-2022-069090 (PMC10151860; doi:10.1136/bmjopen-2022-069090), 2023-04-27
Supplement: bmjopen-2022-069090.draft_revisions.pdf [file bmjopen-2022-069090.draft_revisions.pdf]

# BMJ Open

BMJ Open is committed to open peer review. As part of this commitment we make the peer review history of every article we publish publicly available.

When an article is published we post the peer reviewers' comments and the authors' responses online. We also post the versions of the paper that were used during peer review. These are the versions that the peer review comments apply to.

The versions of the paper that follow are the versions that were submitted during the peer review process. They are not the versions of record or the final published versions. They should not be cited or distributed as the published version of this manuscript.

BMJ Open is an open access journal and the full, final, typeset and author-corrected version of record of the manuscript is available on our site with no access controls, subscription charges or pay-per-view fees (<http://bmjopen.bmj.com>).

If you have any questions on BMJ Open's open peer review process please email [info.bmjopen@bmj.com](mailto:info.bmjopen@bmj.com)

# BMJ Open

## Monitoring multidimensional aspects of quality of life after cancer immunotherapy: protocol for the international multi-centre, observational QUALITOP cohort study

|                               |                                                                                                                                                                                                                                                                                                                                                                                                                                                                                                                                                                                                                                                                                                                                                                                                                                                                                                                                                                                                                                                                                                                                                                                                                                                                                                                                                                                                                                                                                                                                                                                                                                                                                                                                                                                                                                                                                                                                                                                                                                                                                                                                          |
|-------------------------------|------------------------------------------------------------------------------------------------------------------------------------------------------------------------------------------------------------------------------------------------------------------------------------------------------------------------------------------------------------------------------------------------------------------------------------------------------------------------------------------------------------------------------------------------------------------------------------------------------------------------------------------------------------------------------------------------------------------------------------------------------------------------------------------------------------------------------------------------------------------------------------------------------------------------------------------------------------------------------------------------------------------------------------------------------------------------------------------------------------------------------------------------------------------------------------------------------------------------------------------------------------------------------------------------------------------------------------------------------------------------------------------------------------------------------------------------------------------------------------------------------------------------------------------------------------------------------------------------------------------------------------------------------------------------------------------------------------------------------------------------------------------------------------------------------------------------------------------------------------------------------------------------------------------------------------------------------------------------------------------------------------------------------------------------------------------------------------------------------------------------------------------|
| Journal:                      | <i>BMJ Open</i>                                                                                                                                                                                                                                                                                                                                                                                                                                                                                                                                                                                                                                                                                                                                                                                                                                                                                                                                                                                                                                                                                                                                                                                                                                                                                                                                                                                                                                                                                                                                                                                                                                                                                                                                                                                                                                                                                                                                                                                                                                                                                                                          |
| Manuscript ID                 | bmjopen-2022-069090                                                                                                                                                                                                                                                                                                                                                                                                                                                                                                                                                                                                                                                                                                                                                                                                                                                                                                                                                                                                                                                                                                                                                                                                                                                                                                                                                                                                                                                                                                                                                                                                                                                                                                                                                                                                                                                                                                                                                                                                                                                                                                                      |
| Article Type:                 | Protocol                                                                                                                                                                                                                                                                                                                                                                                                                                                                                                                                                                                                                                                                                                                                                                                                                                                                                                                                                                                                                                                                                                                                                                                                                                                                                                                                                                                                                                                                                                                                                                                                                                                                                                                                                                                                                                                                                                                                                                                                                                                                                                                                 |
| Date Submitted by the Author: | 10-Oct-2022                                                                                                                                                                                                                                                                                                                                                                                                                                                                                                                                                                                                                                                                                                                                                                                                                                                                                                                                                                                                                                                                                                                                                                                                                                                                                                                                                                                                                                                                                                                                                                                                                                                                                                                                                                                                                                                                                                                                                                                                                                                                                                                              |
| Complete List of Authors:     | <p>Vinke, Petra; University Medical Centre Groningen, Epidemiology<br/> Combalia, Marc; Institut d'Investigacions Biomediques August Pi i Sunyer; Universitat de Barcelona, Dermatology<br/> de Bock, Geertruida H.; University Medical Centre Groningen, Epidemiology<br/> Leyrat, Clémence; London School of Hygiene and Tropical Medicine, Medical Statistics<br/> Spanjaart, Anne; Amsterdam University Medical Centres, Hematology<br/> Dalle, Stephane; Cancer Research Center of Lyon, Lyon Sud Hospital, Dermatology; University Claude Bernard Lyon 1<br/> Gomes da Silva, Maria; Francisco Gentil Portuguese Institute for Oncology of Lisbon, Hematology<br/> Fouda Essongue, Aurore; Cancer Institute of the Hospices Civils de Lyon, ImmuCare<br/> Rabier, Aurélie; Cancer Institute of the Hospices Civils de Lyon, ImmuCare<br/> Pannard, Myriam; Lumière University Lyon 2 Psychology Institute, INSERM Unit U1296 Radiation: Defence, Health, Environment<br/> Jalali, Mohammad ; Harvard Medical School, MGH Institute for Technology Assessment<br/> Elgammal, Amal; Scientific Academy for Service Technology e.V. (ServTech); Egypt University of Informatics<br/> Papazoglou, Mike; Scientific Academy for Service Technology e.V. (ServTech); University of New South Wales School of Computer Science and Engineering<br/> Hacid, Mohand-Said; Université Claude Bernard Lyon 1, LIRIS, CNRS UMR 5205<br/> Rioufol, Catherine; Hospital Lyon-South, Clinical Oncology Pharmacy Department<br/> Kersten, Marie-José; Amsterdam University Medical Centres, Hematology<br/> van Oijen, Martijn; Amsterdam University Medical Centres, Medical Oncology, Cancer Center Amsterdam<br/> Suazo-Zepeda, Erick; University Medical Centre Groningen, Epidemiology<br/> Malhotra, Ananya; London School of Hygiene and Tropical Medicine Faculty of Epidemiology and Population Health<br/> Coquery, Emmanuel; Université Claude Bernard Lyon 1, LIRIS, CNRS UMR 5205<br/> Anota, Amélie; Centre Léon Bérard, Direction of Clinical Research and Innovation &amp; Human and Social Sciences; French National platform</p> |

|           |                                                                                                                                                                                                                                                                                                                                                                                                                                                                                                                                                                                                                                                                                                                                                                                                                                                                                                                                                        |
|-----------|--------------------------------------------------------------------------------------------------------------------------------------------------------------------------------------------------------------------------------------------------------------------------------------------------------------------------------------------------------------------------------------------------------------------------------------------------------------------------------------------------------------------------------------------------------------------------------------------------------------------------------------------------------------------------------------------------------------------------------------------------------------------------------------------------------------------------------------------------------------------------------------------------------------------------------------------------------|
|           | Quality of Life and Cancer<br>Preau, Marie; Lumière University Lyon 2 Psychology Institute, INSERM Unit U1296 Radiation: Defence, Health, Environment<br>Fauvernier, Mathieu; Hospices Civils de Lyon, Pôle Santé Publique, Service de Biostatistique et Bioinformatique; CNRS, UMR 5558, Laboratoire de Biométrie et Biologie Évolutive, Équipe Biostatistique-Santé<br>Coz, Elsa; Hospices Civils de Lyon, Pôle Santé Publique, Service de Biostatistique et Bioinformatique; CNRS, UMR 5558, Laboratoire de Biométrie et Biologie Évolutive, Équipe Biostatistique-Santé<br>Puig, Susana; Universitat de Barcelona, Dermatology; Centro de Investigación Biomédica en Red de Enfermedades Raras, Instituto de Salud Carlos III<br>Maucort-Boulch, Delphine; Hospices Civils de Lyon, Pôle Santé Publique, Service de Biostatistique et Bioinformatique; CNRS, UMR 5558, Laboratoire de Biométrie et Biologie Évolutive, Équipe Biostatistique-Santé |
| Keywords: | Adverse events < THERAPEUTICS, ONCOLOGY, Epidemiology < ONCOLOGY                                                                                                                                                                                                                                                                                                                                                                                                                                                                                                                                                                                                                                                                                                                                                                                                                                                                                       |
|           |                                                                                                                                                                                                                                                                                                                                                                                                                                                                                                                                                                                                                                                                                                                                                                                                                                                                                                                                                        |

SCHOLARONE™  
Manuscripts

1  
2  
3 **1 Monitoring multidimensional aspects of quality of life after cancer immunotherapy: protocol for**  
4 **the international multi-centre, observational QUALITOP cohort study**  
5  
6  
7  
8  
9

10 P. C. Vinke<sup>1\*</sup>, M. Combalia<sup>2,3\*</sup>, G.H. de Bock<sup>1</sup>, C. Leyrat<sup>4</sup>, A.M. Spanjaart<sup>5</sup>, S. Dalle<sup>6,7,8</sup>, M. Gomes da Silva<sup>9</sup>, A.  
11 Fouda Essongue<sup>7</sup>, A. Rabier<sup>7</sup>, M. Pannard<sup>10</sup>, M.S. Jalali<sup>11</sup>, A. Elgammal<sup>12,13</sup>, M. Papazoglou<sup>12,14,15</sup>, M.S. Hacid<sup>16</sup>, C.  
12 Rioufol<sup>17</sup>, M.J. Kersten<sup>5</sup>, M.G.H. van Oijen<sup>18</sup>, E. Suazo-Zepeda<sup>1</sup>, A. Malhotra<sup>19</sup>, E. Coquery<sup>16</sup>, A. Anota<sup>20,21</sup>, M.  
13 Preau<sup>10</sup>, M. Fauvernier<sup>8,22,23</sup>, E. Coz<sup>8,22,23</sup>, S. Puig<sup>2,3,24,25</sup> #, D. Maucort-Boulch<sup>8,22,23</sup>

14  
15  
16  
17  
18 \*Contributed equally, # Corresponding author  
19  
20  
21

22 1. Department of Epidemiology, University Medical Center Groningen, University of Groningen, Groningen, The  
23 Netherlands  
24  
25

26 2. Dermatology Department, Hospital Clinic, Universitat de Barcelona, Barcelona, Spain  
27

28 3. Institut d'investigacions Biomèdiques August Pi i Sunyer (IDIBAPS), Barcelona, Spain  
29

30 4. Department of Medical Statistics & Inequalities in Cancer Outcomes Network, Faculty of Epidemiology and Population  
31 Health, London School of Hygiene and Tropical medicine, London, UK  
32

33 5. Department of Hematology, Amsterdam University Medical Centers, Cancer Center Amsterdam and LYMMCARE,  
34 Amsterdam, the Netherlands  
35  
36

37 6. Cancer Research Center of Lyon, Dermatology Department, Lyon Sud Hospital, Hospices Civils de Lyon, 69495 Pierre-  
38 Bénite, France  
39

40 7. ImmuCare (Immunology Cancer Research) Cancer Institute of the Hospices Civils de Lyon, 69229 Lyon, France  
41

42 8. Claude Bernard University Lyon 1, 69100 Villeurbanne, France  
43

44 9. Department of Hematology, Portuguese Institute of Oncology, Lisbon, Portugal  
45

46 10. INSERM Unit U1296 Radiation: Defence, Health, Environment, University Lumière Lyon 2, Institute of Psychology, Bron,  
47 France  
48  
49

50 11. MGH Institute for Technology Assessment, Harvard Medical School, Boston, MA, USA  
51

52 12. Scientific Academy for Service Technology e.V. (ServTech), Behlertstr. 3a/Haus B2, 14467 Potsdam, Germany  
53

54 13. Egypt University of Informatics, New Administrative Capital, Cairo, Egypt  
55

56 14. University of New South Wales, School of Computer Science and Engineering, Sydney, NSW 2052, Australia  
57

58 15. Macquarie University, School of Computing, 4 Research Park Drive NSW 2109, Australia  
59

60 16. University Claude Bernard Lyon 1, LIRIS, CNRS UMR 5205, France

- 1  
2  
3 31 17. Clinical Oncology Pharmacy Department, Hospital Lyon Sud, Cancer Institute of the Hospices Civils de Lyon (IC-HCL) -  
4  
5 32 EA3738 CICLY Lyon 1 University, Lyon, France  
6  
7 33 18. Department of Medical Oncology, Cancer Center Amsterdam, Amsterdam University Medical Centers, University of  
8  
9 34 Amsterdam, the Netherlands  
10  
11 35 19. Faculty of Epidemiology and Population Health, London School of Hygiene & Tropical Medicine, London, United  
12  
13 36 Kingdom  
14  
15 37 20. Direction of Clinical Research and Innovation & Human and Social Sciences, Centre Léon Bérard, Lyon, France  
16  
17 38 21. French National platform Quality of Life and Cancer, Lyon, France  
18  
19 39 22. Hospices Civils de Lyon, Pôle Santé Publique, Service de Biostatistique et Bioinformatique, F-69003, Lyon, France  
20  
21 40 23. CNRS, UMR 5558, Laboratoire de Biométrie et Biologie Évolutive, Équipe Biostatistique-Santé, F-69100, Villeurbanne,  
22  
23 41 France  
24  
25 42 24. University of Barcelona (UB), Barcelona, Spain  
26  
27 43 25. Centro de Investigación en Red de Enfermedades Raras (CIBERER), Instituto de Salud Carlos III, Barcelona, Spain  
28  
29 44

29 45 **Corresponding authors:**

30  
31 46 Susana Puig, MD, PhD  
32  
33 47 Chief, Dermatology Service  
34  
35 48 Dermatology Department, Hospital Clinic of Barcelona  
36  
37 49 Villarroel 170. 08036, Barcelona, Spain  
38  
39 50 Email: spuig@clinic.cat/susipuig@gmail.com  
40  
41 51 Tel.: +34 93 2275400 ext. 5692  
42  
43 52  
44  
45 53 Petra Vinke, PhD, epidemiologist  
46  
47 54 Department of Epidemiology (FA40), University Medical Center Groningen  
48  
49 55 Hanzeplein 1, PO box 30.001  
50  
51 56 9700 RB Groningen, the Netherlands  
52  
53 57 Email: p.c.vinke@umcg.nl  
54  
55 58 Tel.: +31 (0)50 361 7298  
56  
57 59

58 59 **Word count:** 3712  
59  
60

## 60 ABSTRACT

61 **Introduction:** Immunotherapies, such as immune checkpoint inhibitors and chimeric antigen  
62 receptor T-cell therapy, have significantly improved the clinical outcomes of various malignancies.  
63 However, they also cause immune-related adverse events (irAEs) that can be challenging to predict,  
64 prevent and treat. Although they likely interact with health-related quality of life (HRQoL), most  
65 existing evidence on this topic has come from clinical trials with eligibility criteria that may not  
66 accurately reflect real-world settings. The QUALITOP project will study HRQoL in relation to irAEs  
67 and its determinants in a real-world study of patients treated with immunotherapy.

68 **Methods and analysis:** This international, observational, multi-centre study includes consortia from  
69 France, the Netherlands, Portugal and Spain. It will include adult cancer patients treated with  
70 immunotherapy from historical real-world databases, medical administrative registries and  
71 specifically recruited prospective cohorts. Clinical health status, HRQoL and psychosocial well-being  
72 will be monitored until 18 months after treatment initiation with a tailored questionnaire completed  
73 at regular intervals. Using advanced statistical methods, including causal inference methods, artificial  
74 intelligence algorithms and simulation modelling, we will use data from the QUALITOP cohort to  
75 improve the understanding of the complex relationships between treatment regimens, patient  
76 characteristics, irAEs and HRQoL.

77 **Ethics and dissemination:** All aspects of the QUALITOP project will be conducted in accordance with  
78 the Declaration of Helsinki and with ethical approval from a suitable local ethics committee, and all  
79 patients will provide signed informed consent. In addition to standard dissemination efforts in the  
80 scientific literature, the data and outcomes will contribute to a smart digital platform and medical  
81 data lake. These will (1) help increase knowledge about the impact of immunotherapy, (2) facilitate  
82 improved interactions between patients, clinicians and the general population, and (3) contribute to  
83 personalised medicine.

84

## 85 **Keywords**

86 Neoplasms, Immunotherapy, Quality of Life, Drug-related Side Effects and Adverse Reactions,

87 Immune Check Point Inhibitors, Receptors, Chimeric Antigen

88

## 89 **Strengths and limitations of this study**

- 90 • The QUALITOP project will create an international, multi-centre, real-world cohort that
- 91 aggregates data of multiple types and from multiple sources.
- 92 • The resulting agile data and analytics platform will improve the quality of data available to care
- 93 professionals when interacting with patients, helping to bring personalised medicine to the
- 94 forefront.
- 95 • By developing innovative analytic tools that respect European privacy regulations, the project
- 96 will accelerate knowledge acquisition for the stakeholders.
- 97 • Despite its potential benefits, the QUALITOP project relies on data from diverse patient groups
- 98 and from partly validated patient questionnaires.

## 99 INTRODUCTION

100 Cancer immunotherapy has revolutionised oncology care over the last two decades, adding to the  
101 existing therapeutic arsenal through its unique action in stimulating the immune system to recognise  
102 and attack cancer cells.[1] Two subtypes of immune intervention that have gained particular  
103 interest, namely immune checkpoint inhibitors (ICIs) and chimeric antigen receptor T cells (CAR T-  
104 cells), have hugely different mechanisms of action, indications and adverse events. Moreover, we  
105 lack long-term data on their health effects due to their relative novelty. International registries that  
106 monitor patient well-being in real-life settings provide invaluable opportunities to fill such  
107 knowledge gaps.

108 Immunotherapies trigger unique toxicities by activating the immune system to attack healthy cells.  
109 These immune-related adverse events (irAEs) occur in up to 96% of patients who receive ICIs, with  
110 severe irAEs reported in 10%–28% of patients receiving ICI monotherapy (Common Terminology  
111 Criteria for Adverse Events, grade  $\geq 3$ ) [2–5] and 59% of patients receiving combination therapy.[5]  
112 Dermatological, gastrointestinal and endocrine irAEs are most common, and management varies  
113 from symptomatic treatment for mild (grade 1–2) irAEs to corticosteroid or immunosuppressant  
114 (e.g., infliximab) treatment, or even permanent immunotherapy cessation, for life-threatening  
115 (grade 4) irAEs.[6] Nevertheless, toxicity profiles after ICI therapy appear more favourable than  
116 those of chemotherapy, with lower risks of developing any AEs or severe AEs (grade  $\geq 3$ ) for  
117 immunotherapy.[7] CAR T-cell therapy also causes various treatment-specific irAEs, with cytokine  
118 release syndrome, immune effector cell-associated neurotoxicity syndrome, infection and cytopenia  
119 the most common and severe in the acute phase (<28 days after CAR T-cell infusion).[8] Although  
120 irAEs can be life-threatening, they are usually reversible with early intervention. The most common  
121 long-term side effects are ongoing cytopenias, impaired immune reconstitution with B-cell aplasia,  
122 T-cell depletion and hypogammaglobulinemia with increased risk of infection.[9]  
123 Besides improved clinical outcomes, immunotherapy should offer the patient psychosocial benefits



1  
2  
3 124 compared with conventional therapies. To this end, trials have reported smaller impairments in  
4  
5 125 health-related quality of life (HRQoL), longer times to HRQoL deterioration and better control of  
6  
7 126 cancer symptoms.[10,11] However, immunotherapies and their associated irAEs may still affect  
8  
9  
10 127 HRQoL given that we know little of their associated late-onset and long-lasting effects.[12]  
11  
12 128 Moreover, although Immunotherapy has clear and proven benefits over conventional anticancer  
13  
14 129 treatments,[10,11,13–19] this evidence has predominantly come from clinical trials that have strict  
15  
16 130 eligibility criteria. These data may exclude patients with poor performance status (Eastern  
17  
18 131 Cooperative Oncology Group, performance status >1), concomitant cancers, auto-immune diseases  
19  
20 132 or long-term systemic corticosteroid use.[3,20] Therefore, we do not know if the clinical and  
21  
22 133 psychosocial benefits of immunotherapy in trial settings apply to real-world cohorts. The growth in  
23  
24 134 survivor populations as these treatments elicit durable clinical responses and long-term remission  
25  
26 135 for malignancies that previously had poor prognoses [21] emphasises the need for research into the  
27  
28 136 long-term well-being and HRQoL of patients treated with these therapies.

29  
30  
31  
32 137 We aim to study the multidimensional aspects of patients' HRQoL, the irAEs that develop during ICI  
33  
34 138 and CAR T-cell therapy, and the relevant determinants of both, using a purpose-built smart digital  
35  
36 139 platform with a medical data lake. This digital platform will improve data provision to various stake  
37  
38 140 holders about risk profiles for irAE development or HRQoL deterioration. In this way, we can  
39  
40 141 improve personalised and shared decision making for future patients eligible for immunotherapy.

42  
43  
44  
45  
46  
47  
48  
49  
50  
51  
52  
53  
54  
55  
56  
57  
58  
59  
60

## 143 **METHODS AND ANALYSIS**

### 144 **Study design**

145 The '*Monitoring multidimensional aspects of **Quality of Life** after cancer **Immuno**Therapy, an **Open***  
146 *smart digital **Platform** for personalised prevention and patient management'* (QUALITOP) project is  
147 an international, multi-centre, real-world, observational cohort study. We will provide insights into

1  
2  
3 148 the medical and psychosocial determinants of quality of life after cancer immunotherapy, making  
4  
5 149 use of big data analyses, artificial intelligence and simulation modelling, before integrating the  
6  
7  
8 150 results in an information technology platform developed for the project. Additional information can  
9  
10 151 be found on the project's website.[22]

11  
12 152 We will study adverse events and quality of life among patients with cancer during and after  
13  
14 153 immunotherapy. The QUALITOP cohort will combine a historical cohort of existing patients and a  
15  
16  
17 154 prospective cohort enrolled specifically for this project (**Figure 1**). The historical cohort will comprise  
18  
19 155 patient data routinely collected in existing databases and medical registries in Spain, France,  
20  
21 156 Portugal and the Netherlands, for which existing informed consent allows the re-use of data within  
22  
23 157 the context of this European collaboration. For the prospective cohort, patients will be recruited in  
24  
25 158 the same countries under the coordination of Hospital Clinic de Barcelona (IDIBAPS), Hospices Civils  
26  
27 159 de Lyon, Instituto Português de Oncologia Lisboa, and Amsterdam University Medical Centers and  
28  
29 160 University Medical Center Groningen, respectively. **Figure 2** shows the study timeline. Note that  
30  
31 161 patients will not be included in both the historic and prospective cohorts.  
32  
33  
34  
35

## 36 162 **Patient selection**

37  
38  
39 163 Patients will be eligible for inclusion in a cohort if they are aged  $\geq 18$  years at the time of signing  
40  
41 164 informed consent and have an oncological diagnosis either treated or to be treated with ICIs or CAR  
42  
43 165 T-cells (as monotherapy or in combination with other anticancer treatments). Patients treated as  
44  
45 166 part of a clinical trial may also be included if permitted by the clinical trial. However, we will exclude  
46  
47 167 patients who are pregnant, under guardianship or who refuse to sign informed consent. For the  
48  
49 168 prospective cohort, patients can be recruited from the decision for immunotherapy until their  
50  
51 169 second cycle of immunotherapy. Patients receiving CAR T-cell therapy will be recruited from after  
52  
53 170 leukapheresis to the start of lymphodepleting chemotherapy, before CAR T-cell infusion.  
54  
55  
56  
57

## 58 171 **Study outcomes**

172 The primary outcome of the QUALITOP study is HRQoL, combining the patient's perspective of their  
 173 physical, psychological and social functioning.[23] We will measure this outcome repeatedly in the  
 174 prospective cohort and obtain data for a selection of patients and time points in the historic cohort.  
 175 The secondary outcome of the QUALITOP study is the incidence and severity of irAEs, which we will  
 176 extract from the electronic records for patients in both cohorts.

## 177 Data collection

### 178 Overview of data sources and timeline

179 Patient data for both the historic and prospective cohorts will come from existing and new  
 180 databases at sites in France, the Netherlands, Portugal and Spain, as summarised in Table 1 and  
 181 detailed in Supplemental File 1. Each study site has different specialisations and will cover different  
 182 oncological diagnoses and therapies.

184 **Table 1. Overview of data sources and their population characteristics per country**

| Study site                                      | Name of existing study/database | Cohort + period of data collection                    | Oncological diagnosis | Therapy              |
|-------------------------------------------------|---------------------------------|-------------------------------------------------------|-----------------------|----------------------|
| <b>France</b>                                   |                                 |                                                       |                       |                      |
| <i>Hospices Civils de Lyon</i>                  | Immucare Elderly                | Historical (2007–2020)                                | Any solid tumour      | ICIs                 |
| <i>Hospices Civils de Lyon</i>                  | Immucare BASE                   | Historical (2019 onward)<br>Prospective (2021 onward) | Any solid tumour      | ICIs                 |
| <i>Hospices Civils de Lyon</i>                  | QoLD CART                       | Historical (2021 onward)                              | Lymphoma              | CAR T-cells          |
| <i>Hospices Civils de Lyon</i>                  | QUALITOP CART                   | Prospective (2022 onward)                             | Lymphoma              | CAR T-cells          |
| <b>The Netherlands</b>                          |                                 |                                                       |                       |                      |
| <i>University Medical Center Groningen</i>      | OncoLifeS                       | Historical (2015 onward)<br>Prospective (2021 onward) | Lung cancer           | ICIs                 |
| <i>Nationwide CAR-T cohort</i>                  | Follow that CAR                 | Historical (2020–2021)<br>Prospective (2021 onward)   | Lymphoma              | CAR T-cells          |
| <i>Nationwide Cancer Registry (IKNL)</i>        | eQuiPe                          | Historical (2016–2020)                                | Any malignancy        | Any treatment        |
| <b>Portugal</b>                                 |                                 |                                                       |                       |                      |
| <i>Instituto Português de Oncologia, Lisboa</i> | QUALITOP Lymphoma               | Prospective (2021 onward)                             | Lymphoma              | CAR T-cells,<br>ICIs |

| Spain                                                                                     |                |                                                     |          |      |
|-------------------------------------------------------------------------------------------|----------------|-----------------------------------------------------|----------|------|
| <i>Hospital Clinic de Barcelona (IDIBAPS)</i>                                             | Xarxa Melanoma | Historical (2020–2021)<br>Prospective (2021 onward) | Melanoma | ICIs |
| <i>Abbreviations: CAR, chimeric antigen receptor; ICIs, immune checkpoint inhibitors.</i> |                |                                                     |          |      |

185

186

187 **Figure 2** shows the proposed timeline of patient monitoring in the historic and prospective cohorts.

188 Data for eligible patients from the historic cohorts were collected between 2016 and 2021, while

189 patient inclusion for the prospective cohorts was initiated in April 2021 and will continue until

190 January 2023. Afterwards, inclusion is intended to be continued in a sustainability programme. We

191 will monitor patients closely for the first 6 months of treatment or until cessation, after which

192 patients will enter a phase of less intensive monitoring until 18 months after treatment initiation or

193 the QUALITOP project ends (**Figure 2**). Clinical data will be extracted automatically from electronic

194 patient files for both cohorts where possible, with manual extraction by project members for all

195 other data. The QUALITOP questionnaire, which aims to collect data from various psychosocial

196 domains, will only be used in the prospective cohort.

### 197 Data collection in the prospective cohort

198 Except in France, data from the prospective arm of the cohort are being collected and managed in

199 REDCap (Research Electronic Data Capture), hosted by the participating institutions.[24,25] REDCap

200 is a secure, web-based platform designed to support data capture for research studies. It provides

201 the following: 1) an intuitive interface for validated data capture; 2) audit trails for tracking data

202 manipulation and export procedures; 3) automated export procedures for seamless data downloads

203 to common statistical packages; and 4) procedures for data integration and interoperability with

204 external sources. In France, data collection is being managed in Easily, a web-based electronic health

205 record platform developed locally and hosted at Hospices Civils de Lyon. The database structure fits

206 the common set of covariates in QUALITOP.

1  
2  
3 207 *Clinical data*  
4  
5

6 208 Clinical data will be extracted from electronic patient files for each routine visit in the first 6 months  
7  
8 209 of treatment and at fixed timepoints in the following year (9, 12 and 18 months). The timing of  
9  
10 210 routine visits will differ by treatment type (ICI or CAR T-cell). We will assess medical history,  
11  
12 211 medication use, prior anticancer treatments and cancer characteristics at the initiation of  
13  
14 212 immunotherapy. Both at baseline and during follow-up, we will collect data from physical  
15  
16 213 examinations (i.e., weight, performance status, blood pressure), laboratory assessments (i.e., C-  
17  
18 214 reactive protein, neutrophils, leukocytes) and related to irAEs according to the Common  
19  
20 215 Terminology Criteria for Adverse Events, version 5, of the National Cancer Institute.[26] Data about  
21  
22 216 treatment for irAEs will be collected according to BioPortal's Drug Ontology,[27] available in REDCap.  
23  
24 217 We will evaluate treatment response using the RECIST criteria for solid tumours [28] and the Lugano  
25  
26 218 criteria for lymphomas.[29]  
27  
28  
29  
30

31 219 *Psychosocial questionnaires*  
32  
33

34 220 We developed psychosocial questionnaires to assess the multiple dimensions of quality of life and its  
35  
36 221 potential psychosocial determinants in patients, necessary for the minimal data set of each patient  
37  
38 222 included in the prospective cohort. A more in-depth questionnaire is issued at baseline and a shorter  
39  
40 223 version is issued during follow-up at 3, 6, 12 and 18 months. We also modified the questionnaire  
41  
42 224 slightly for patients receiving CAR T-cell therapy. **Table 2** summarises the domains included in each  
43  
44 225 version of the questionnaire.  
45  
46  
47

48 226 The flowchart in **Figure 3** illustrates the hypothesised framework for the interrelatedness of the  
49  
50 227 questionnaire domains and their association with quality of life. We created French, English,  
51  
52 228 Portuguese, Spanish and Dutch versions of the questionnaires, and when no validated translation  
53  
54 229 existed, an external service provider specialising in academic and medical translation completed the  
55  
56 230 translation. A researcher in each country also proofread the questionnaires, ensuring that the  
57  
58 231 English version was consistent with his/her language.  
59  
60

1  
2  
3  
4  
5  
6  
7  
8  
9  
10  
11  
12  
13  
14  
15  
16  
17  
18  
19  
20  
21  
22  
23  
24  
25  
26  
27  
28  
29  
30  
31  
32  
33  
34  
35  
36  
37  
38  
39  
40  
41  
42  
43  
44  
45  
46  
47  
48  
49  
50  
51  
52  
53  
54  
55  
56  
57  
58  
59  
60

232

233

For peer review only

234 **Table 2. QUALITOP questionnaire domains at baseline and during follow-up**

| Questionnaire domains                                                                                                                                                                                                                                                                                                                                                                               | Source          | Baseline | Follow-up (3, 6, 12, 18 months) |
|-----------------------------------------------------------------------------------------------------------------------------------------------------------------------------------------------------------------------------------------------------------------------------------------------------------------------------------------------------------------------------------------------------|-----------------|----------|---------------------------------|
| <b>Part 1: Personal and work situation</b>                                                                                                                                                                                                                                                                                                                                                          |                 |          |                                 |
| <i>Sociodemographic factors (work, education, family and living situation)</i>                                                                                                                                                                                                                                                                                                                      | Ad hoc items    | x        | *                               |
| <i>Gender roles</i>                                                                                                                                                                                                                                                                                                                                                                                 | Ad hoc items    | x        | *                               |
| <i>Lifestyle (smoking, alcohol, physical activity, diet)</i>                                                                                                                                                                                                                                                                                                                                        | Ad hoc items    | x        | *                               |
| <i>Family history of cancer</i>                                                                                                                                                                                                                                                                                                                                                                     | Ad hoc items    | x        | *                               |
| <b>Part 2: Your everyday life</b>                                                                                                                                                                                                                                                                                                                                                                   |                 |          |                                 |
| <i>Health-related Quality of Life</i>                                                                                                                                                                                                                                                                                                                                                               | FACT-G/FACT-Lym | x        | x                               |
| <b>Part 3: How you are feeling</b>                                                                                                                                                                                                                                                                                                                                                                  |                 |          |                                 |
| <i>Anxiety and depression</i>                                                                                                                                                                                                                                                                                                                                                                       | HADS            | x        | x                               |
| <i>Intolerance to uncertainty</i>                                                                                                                                                                                                                                                                                                                                                                   | IUS Short form  | x        |                                 |
| <b>Part 4: Your support network</b>                                                                                                                                                                                                                                                                                                                                                                 |                 |          |                                 |
| <i>Social support</i>                                                                                                                                                                                                                                                                                                                                                                               | Ad hoc items    | x        | x                               |
| <b>Part 5: Medication and treatment</b>                                                                                                                                                                                                                                                                                                                                                             |                 |          |                                 |
| <i>Health literacy</i>                                                                                                                                                                                                                                                                                                                                                                              |                 | x        |                                 |
| <i>Medication use and symptoms</i>                                                                                                                                                                                                                                                                                                                                                                  | Ad hoc items #  | x        | x                               |
| <i>Medication beliefs</i>                                                                                                                                                                                                                                                                                                                                                                           |                 | x        | x                               |
| <b>Part 6: Opinions on cancer treatment and care</b>                                                                                                                                                                                                                                                                                                                                                |                 |          |                                 |
| <i>Doctor-patient relationship</i>                                                                                                                                                                                                                                                                                                                                                                  | Ad hoc items ## | x        | x                               |
| <i>Treatment expectations</i>                                                                                                                                                                                                                                                                                                                                                                       |                 | x        | x                               |
| <p><i>*only if changes occurred since baseline</i></p> <p><i># adapted for CAR T-cell therapy recipients</i></p> <p><i>## not included in the questionnaire for CAR T-cell therapy recipients</i></p> <p><i>Abbreviations: FACT, Functional Assessment of Cancer Therapy (-G, general; -Lym, lymphoma); HADS, Hospital Anxiety and Depression Scale; IUS, Intolerance of Uncertainty Scale.</i></p> |                 |          |                                 |

235

236 The first part of the questionnaire, issued at baseline, characterises the population based on  
 237 sociodemographic and psychosocial factors. Subsequently, the questionnaire includes assessments  
 238 of quality of life, anxiety, depression, (in)tolerance of uncertainty, social support, health literacy,  
 239 medication-related beliefs and behaviours, relationship with their main physician and expectations  
 240 of immunotherapy. The follow-up questionnaires will track longitudinal changes in these aspects.  
 241 Patients will be invited to signal any change in their personal situation every time they take the

1  
2  
3 242 questionnaire (e.g., patient stopped smoking, patient is now divorced, a new family member  
4  
5 243 diagnosed with cancer) and will be asked to complete the rest of the questionnaire at each  
6  
7 244 assessment. We will assess these features using ad hoc items and established questionnaires.  
8  
9  
10 245 Ad hoc items explore various features in the QUALITOP questionnaire. First, they explore  
11  
12 246 sociodemographic data (e.g., sex, age, number of children, marital status), gender roles (e.g., health  
13  
14 247 responsibilities in a relationship), health habits (e.g., smoking, drinking, physical activity) and family  
15  
16 248 history of cancer (e.g., number of family members who have or have had cancer, whether patients  
17  
18 249 underwent genetic testing for cancer). Second, they explore the four main dimensions of social  
19  
20 250 support [30] (material, informational, emotional, esteem) and how patients feel that they are  
21  
22 251 available and provided by their partners (if applicable), family members and friends/loved ones.  
23  
24 252 Third, they explore medication-related beliefs and behaviours, including physical discomfort,  
25  
26 253 medication use, number of doctors usually consulted outside cancer care, self-medication,  
27  
28 254 complementary care (e.g., physiotherapist, psychologist) and perception of so-called 'natural'  
29  
30 255 medicines and practices. Finally, they explore opinions about cancer treatment and care, adapting  
31  
32 256 items from the Treatment Representations Inventory [31] to immunotherapy for the doctor-patient  
33  
34 257 relationship, perception of the level of information provided and expected side effects or outcomes.  
35  
36 258 The Functional Assessment of Cancer Therapy-General (FACT-G),[32] suitable for patients with any  
37  
38 259 tumour type, will assess quality of life. This validated questionnaire has been widely used for this  
39  
40 260 purpose since the nineties.[33,34] The FACT-Lym, which includes 15 additional tailored questions,  
41  
42 261 will then be used for patients with lymphoma.[35] We will use the authorised Dutch, French,  
43  
44 262 Portuguese and Spanish versions of each questionnaire.  
45  
46  
47 263 The validated Dutch, French, Portuguese and Spanish versions of the Hospital Anxiety and  
48  
49 264 Depression Scale (HADS) will be used to assess anxiety and depression longitudinally.[36–39] We aim  
50  
51 265 to observe indicators of deterioration in quality of life and/or a response-shift phenomenon (i.e.,  
52  
53 266 adaptation and adjustment to the disease that allows quality of life to remain equivalent despite the  
54  
55  
56  
57  
58  
59  
60



1  
2  
3 267 illness).[40–43]  
4  
5

6 268 Immunotherapy remains an innovative treatment associated with uncertain treatment outcomes  
7

8 269 and side effects. Therefore, we will use the short version of the Intolerance of Uncertainty Scale (IUS  
9

10 270 Short Form) to assess possible difficulties with the management of uncertain situations.[44]  
11  
12

13 271 Health literacy, referring to the ability of individuals to access, understand, assess and use  
14

15 272 information and services for health, will be assessed using the Single-Item Literacy Screener (SILS).  
16

17 273 This has been validated in French and Spanish [45,46] and translated to Portuguese and Dutch. The  
18

19 274 SILS aims to measure participants' functional literacy; that is, their ability to understand information  
20

21 275 that might be necessary for their health.  
22  
23  
24

#### 25 276 Data collection in the historic cohort 26 27

28 277 For the historic databases, we aim to collect the same clinical data collected for patients in the  
29

30 278 prospective cohort. For patient-reported psychosocial data, inclusion will depend on its availability in  
31

32 279 each existing database. **Table 3** summarises the known data availability in the different historic  
33

34 280 databases, by domain, for the baseline and follow-up data.  
35  
36  
37

38 281  
39  
40  
41  
42  
43  
44  
45  
46  
47  
48  
49  
50  
51  
52  
53  
54  
55  
56  
57  
58  
59  
60

282 **Table 3. Data availability for historic databases**

|                                                                                                                                                                                                                                  | Immucare Elderly | Immucare Base | QoLD CART | OncoLifeS | Follow that CAR | eQuiPe | Xarxa Melanoma |
|----------------------------------------------------------------------------------------------------------------------------------------------------------------------------------------------------------------------------------|------------------|---------------|-----------|-----------|-----------------|--------|----------------|
| <b>Baseline data</b>                                                                                                                                                                                                             |                  |               |           |           |                 |        |                |
| Lifestyle<br>(diet, alcohol, smoking)                                                                                                                                                                                            | ✓                |               |           | ✓         |                 |        | ✓              |
| Family history                                                                                                                                                                                                                   |                  | ✓             |           | ✓         |                 |        | ✓              |
| Sociodemographic factors                                                                                                                                                                                                         | ✓                | ✓             |           | ✓         |                 |        |                |
| Physical well-being<br>(frailty, activities of daily living, performance status)                                                                                                                                                 | ✓                | ✓             |           | ✓         | ✓               |        |                |
| HRQoL                                                                                                                                                                                                                            |                  |               | ✓*        | ✓**       | ✓*/**           | ✓**    | ✓**            |
| Medical history                                                                                                                                                                                                                  | ✓                | ✓             | ✓         | ✓         | ✓               |        | ✓              |
| Cancer characteristics<br>(diagnosis, staging, past treatments)                                                                                                                                                                  | ✓                | ✓             |           | ✓         | ✓               | ✓      | ✓              |
| Laboratory assessments                                                                                                                                                                                                           | ✓                | ✓             |           | ✓         | ✓               |        |                |
| Clinical assessments                                                                                                                                                                                                             | ✓                | ✓             |           | ✓         | ✓               |        | ✓              |
| <b>Follow-up data</b>                                                                                                                                                                                                            |                  |               |           |           |                 |        |                |
| Lifestyle<br>(diet, alcohol, smoking)                                                                                                                                                                                            |                  |               |           |           |                 |        |                |
| Physical well-being<br>(frailty, activities of daily living, performance status)                                                                                                                                                 |                  | ✓             |           |           | ✓               |        |                |
| HRQoL                                                                                                                                                                                                                            |                  |               | ✓         | ✓         | ✓               |        |                |
| Laboratory assessments                                                                                                                                                                                                           |                  | ✓             |           | ✓         | ✓               |        |                |
| Clinical assessments                                                                                                                                                                                                             |                  | ✓             |           | ✓         | ✓               |        | ✓              |
| Adverse events                                                                                                                                                                                                                   | ✓                | ✓             | ✓         | ✓         | ✓               |        | ✓              |
| Survival                                                                                                                                                                                                                         | ✓                | ✓             | ✓         | ✓         | ✓               | ✓      | ✓              |
| *FACT-Lym (Functional Assessment of Cancer Therapy, lymphoma)                                                                                                                                                                    |                  |               |           |           |                 |        |                |
| ** EORTC-QLQ-C30                                                                                                                                                                                                                 |                  |               |           |           |                 |        |                |
| Abbreviations: EORTC-QLQ-C30, European Organization for Research and Treatment of Cancer core Quality of Life Questionnaire; FACT-Lym, Functional Assessment of Cancer Therapy, lymphoma; HRQoL, health-related quality of life. |                  |               |           |           |                 |        |                |

283

284

## 285 Data analysis plan

### 286 Data harmonisation and handling of missing data

287 To enable analyses with the data from the historical and/or prospective QUALITOP cohorts, we must  
288 first harmonise the generated data. Separate analyses may be required for the historical datasets  
289 given their heterogeneous structures. Although the structure of data to be collected for the  
290 prospective cohort has been harmonised beforehand, differences in patient populations, treatments  
291 and legislations between the five participating centres mean that differences will exist. Where these  
292 differences result in missing data, we will handle missingness separately for each analysis after  
293 careful consideration of the mechanism, paying close attention to associations between missingness,  
294 outcomes and exposures.[47] The method used will also depend on the nature of the statistical  
295 analysis, such as multiple imputation for regression-based methods [48] and the missing indicator  
296 approach for machine learning algorithms.[49] To capture heterogeneity between participating  
297 centres, we will include a centre effect in all the analyses as either fixed or random effects.[50]

### 298 Statistical analyses

299 We plan to use advanced statistical methods, machine learning techniques and mapping methods to  
300 exploit fully the vast amount of collected data and provide a deep understanding of the causal  
301 mechanisms underlying HRQoL, focusing on adverse events and individual characteristics.

302 The observational nature of the data will require specific methodologies. We will use tools  
303 developed in the framework of the potential outcomes,[51] such as inverse-probability-of treatment  
304 weighting,[52] doubly robust estimators[53] and targeted maximum likelihood estimation,[54] to  
305 account for confounding. Directed acyclic graphs,[55] informed by clinical frameworks like that  
306 depicted in **Figure 3**, will be developed in collaboration with partners to inform variable selection.  
307 These methods will help us to determine the causal effect of irAEs on HRQoL components.

308 Intermediate analyses will be performed to identify the prognostic factors associated with irAEs, and

1  
2  
3 309 boosting methods [56] will be used to determine those factors and their appropriate functional  
4  
5 310 forms. The historical datasets will inform this step.  
6  
7  
8 311 To further address the relationships between irAEs and HRQoL, we will use mediation analysis to  
9  
10 312 disentangle the direct effect of individual characteristics and treatment on HRQoL, considering the  
11  
12 313 effect mediated by irAEs.[57] This should uncover the factors driving HRQoL and could subsequently  
13  
14 314 inform personalised care to maximise HRQoL. This stage will use machine learning algorithms, such  
15  
16 315 as random forests,[58] to develop a prediction model for future HRQoL based on current  
17  
18 316 demographic, psychosocial and clinical information.  
19  
20  
21  
22 317 The data collected in the QUALITOP project will benefit from repeated assessments of HRQoL over  
23  
24 318 18 months, facilitating the study of both individual trajectories over time and the causes and timing  
25  
26 319 of changes in HRQoL. We will use mixed effect models and item response models to analyse the  
27  
28 320 repeated measurements,[59] while simultaneously considering joint modelling to account for death  
29  
30 321 as a competing event.[60]  
31  
32  
33  
34 322 We will then combine the outputs of the disparate analyses to develop a causal loop diagram to  
35  
36 323 illustrate the complex web of medical and psychosocial factors affecting quality of life [61]. This  
37  
38 324 diagram will inform the development and validation of a quantitative simulation model, using a  
39  
40 325 system dynamics method to understand HRQoL after cancer immunotherapy under different  
41  
42 326 hypothetical public health scenarios.  
43  
44  
45

## 46 327 Medical data lake and smart digital platform

47  
48  
49 328 The QUALITOP project also aims to develop data management principles in a smart digital platform  
50  
51 329 and associated medical data lake (**Figure 4**) that will enable networked medical agencies to share  
52  
53 330 and exchange trusted and secure medical data with automated and robust controls based on FAIR  
54  
55 331 (Findable, Accessible, Interoperable, Reusable) principles [62]. The digital platform will use the  
56  
57 332 medical, psychological and psychosocial data collected in the historic and prospective QUALITOP  
58  
59  
60

1  
2  
3 333 cohorts. By employing monitoring technologies and advanced data analytics, the data lake and smart  
4  
5 334 digital platform will allow for the determination of predictive markers in sub-populations associated  
6  
7 335 with irAE development and HRQoL impairment. We will use data-driven automation, prediction, and  
8  
9 336 decision support-analytics with technologies such as artificial intelligence (AI) to make predictions  
10  
11 337 and recommendations for a given set of operator-defined objectives. By leveraging modern analytics  
12  
13 338 and data management capabilities and working with AI methods such as machine learning to  
14  
15 339 improve the HRQoL of patients undergoing immunotherapy and to minimise the risks of relapse,  
16  
17 340 health care organisations can transform existing networks into smart digital health care ecosystems.  
18  
19  
20  
21

## 22 341 Patient monitoring using the smart digital platform

23  
24  
25 342 Finally, the smart digital platform aims to allow not only collaborative, integrated and personalised  
26  
27 343 case monitoring but also actionable treatment adjustments or recommendations. These benefits will  
28  
29 344 help reinforce treatment planning and improve the effectiveness of actions designed to reduce  
30  
31 345 treatment effects, making room for the necessary corrective actions at different stages. Data from  
32  
33 346 the historic Immucare database will be used to develop and test the clustering algorithms that will  
34  
35 347 be integrated in the smart digital platform and used to simplify the data, look for patterns and  
36  
37 348 similarities, and ultimately contribute to personalised patient monitoring.  
38  
39  
40  
41

42 349

## 43 44 45 350 ETHICS AND DISSEMINATION

### 46 47 48 351 Ethical considerations

49  
50  
51 352 The QUALITOP project will be conducted according to the Declaration of Helsinki. The local ethics  
52  
53 353 committees of all participating centres have granted ethical approval. Patients will be invited to  
54  
55 354 participate by their treating physician and will be required to provide signed informed consent. For  
56  
57 355 the historic cohort, data from existing study databases and medical administrative registries will only  
58  
59  
60

1  
2  
3 356 be used if patients had provided signed informed consent that allowed the re-use of data for  
4  
5 357 (international) scientific purposes. For analyses or dissemination activities at both national and  
6  
7 358 international level, data will be protected under the European General Data Protection Regulation.  
8  
9  
10 359 The smart data platform and data lake will ensure privacy under the Security Rule of the Health  
11  
12 360 Insurance Portability and Accountability Act. Moreover, the data lake will only include aggregated  
13  
14 361 data, further ensuring anonymity.  
15  
16

## 17 362 **Patient and public involvement**

18  
19  
20  
21 363 As 'experts by experience', patient representatives play a central role in reporting data on treatment  
22  
23 364 outcomes, making their involvement key to the success of this project. Involvement will be  
24  
25 365 facilitated by embedding the QUALITOP project in the European Cancer Patients Coalition as a health  
26  
27 366 research project on big data and personalised medicine. This will provide invaluable opportunities to  
28  
29 367 gain input and advice from patients and their relatives. In addition, the QUALITOP project can be  
30  
31 368 followed on twitter, through a regular dedicated newsletter and through online events for patients  
32  
33 369 with cancer. In the online meetings, researchers and partners of QUALITOP project can give a  
34  
35 370 comprehensive overview of the project and how it can improve the quality of life of patients. At the  
36  
37 371 same time, patients with cancer will have the opportunity to express their concerns, describe their  
38  
39 372 experiences and give valuable feedback regarding the project. Thus, we offer various routes for  
40  
41 373 proactive and reactive patient involvement to ensure that the research meets the needs and wishes  
42  
43 374 of patients and their families. More detail about these routes to patient and public involvement can  
44  
45 375 be found at the following links:  
46  
47

- 48 376 • European Cancer Patients Coalition: <https://ecpc.org/health-and-research/qualitop/>
- 49 377 • Twitter: @h2020qualitop
- 50 378 • QUALITOP news and event: <https://h2020qualitop.liris.cnrs.fr/wordpress/index.php/>
- 51 379 • QUALITOP LinkedIn: <https://www.linkedin.com/company/qualitop-h2020/>

52  
53  
54  
55  
56  
57  
58  
59  
60 380

## 381 Dissemination

382 Continuing from the strong patient and public involvement throughout the earlier stages of the  
 383 study, we will ensure that our results are not only presented at patient organisation meetings but  
 384 also distributed through national and social media. Furthermore, professional engagement will be  
 385 stimulated by presenting the study results at national and international conferences and by  
 386 submitting manuscripts to peer-reviewed scientific journals. All results will be reported following  
 387 current standards (e.g., STROBE guidelines).[63] The final product of the QUALITOP project, the  
 388 smart digital platform, will also play a central role in the dissemination of information to various  
 389 stakeholders, underpinned by a big medical data lake of aggregated data from the project's various  
 390 data sources. This platform will use secured portals that are accessible to each major stakeholder  
 391 group and will include functions and information tailored to their specific needs (**Table 4**).

392 **Table 4. Specific outcomes expected by key stakeholder group**

| Stakeholder                                                                                       | Expected benefits                                                                                                                                                                                                                                                                                                                                                    |
|---------------------------------------------------------------------------------------------------|----------------------------------------------------------------------------------------------------------------------------------------------------------------------------------------------------------------------------------------------------------------------------------------------------------------------------------------------------------------------|
| <i>Patients</i>                                                                                   | <ul style="list-style-type: none"> <li>• Provide information and feedback on irAE risks, tips, recommendations and evidence-based results from up-to-date studies</li> <li>• Connections with peers (develop peer support) through a web-based platform</li> <li>• Provide education</li> <li>• Allow registration as participants to the QUALITOP cohort</li> </ul> |
| <i>Patients' relatives</i>                                                                        | <ul style="list-style-type: none"> <li>• Provide information about their relative's disease, treatment and irAEs (evidence-based results from up-to-date studies)</li> <li>• Ease connections with other relatives (similar to the peer support for patients)</li> </ul>                                                                                             |
| <i>Haematologists, oncologists and other healthcare providers</i>                                 | <ul style="list-style-type: none"> <li>• Provide information about irAEs, symptomatic treatments and patients' behaviour regarding self-treatment</li> </ul>                                                                                                                                                                                                         |
| <i>The general population</i>                                                                     | <ul style="list-style-type: none"> <li>• Provide information (metadata and syntheses of the most up-to-date information regarding HRQoL after cancer immunotherapy and its determinants)</li> <li>• Communicate policies and recommendations</li> </ul>                                                                                                              |
| <i>Scientists and policymakers</i>                                                                | <ul style="list-style-type: none"> <li>• Provide data-driven analysis functions and sharing of health economic data, conclusions and policies</li> </ul>                                                                                                                                                                                                             |
| <i>Abbreviations: HRQoL, health-related quality of life; irAE, immune-related adverse events.</i> |                                                                                                                                                                                                                                                                                                                                                                      |

393

## DISCUSSION

The QUALITOP project aims to develop and implement a digital immunotherapy platform in Europe. It will use big data analysis, AI and simulation modelling approaches to collect and aggregate real-world HRQoL data, monitor patients' health statuses, conduct causal inference analyses, create harm-reduction recommendations for patients and other stakeholders, and disseminate findings efficiently and effectively. The planned data analyses should expand scientific knowledge about the complex interplay between clinical factors, psychosocial factors and long-term quality of life in a real-life setting after immunotherapy. Beyond this, we plan to use the acquired data and knowledge to nourish a smart digital platform that should offer a host of benefits to various stakeholders. Of course, we anticipate challenges on the path to achieving these outcomes. For example, the COVID-19 pandemic has already affected patient inclusion in the QUALITOP cohorts, which we were able to resolve by receiving a six-month extension from the European Union. Potential effects on treatment regimens and HRQoL may need to be considered in the statistical analyses. We also anticipate regulatory challenges for the smart digital platform, but by respecting the strict European regulations that exist to ensure patient privacy, we expect to deliver this with little difficulty. The QUALITOP project will expand knowledge about the health statuses and quality of life of patients after treatment with either ICI or CAR T-cells in real-world settings, delivering a smart digital platform that can empower cancer patients and inform health care providers. We hope that this project will illustrate that, by making use of smart digital solutions, international collaborations can accelerate the acquisition and dissemination of scientific knowledge surrounding cancer treatment.

414



## 415 **DECLARATIONS**

### 416 ***Author Contributions***

417 All authors have contributed to the conception and design of this study protocol. PCV, MC, GHdB, SP  
418 and DMB drafted the manuscript. All other authors have offered critical revision of the manuscript  
419 for important intellectual content. All authors have read and approved the final manuscript.

### 420 ***Funding***

421 This project has received funding from the European Union's Horizon 2020 research and innovation  
422 programme under grant agreement N° 875171. Additionally, the UK Medical Research Council is  
423 supporting CL (Skills Development Fellowship, MR/T032448/1). The funding sources did not play a  
424 role in the design of the study, collection of data or writing of this protocol.

### 425 ***Competing interests***

426 MJK: honoraria from Kite, a Gilead Company, Novartis and Miltenyi Biotech, Roche, and Bristol  
427 Myers Squibb/Celgene; consultancy or advisory role for Kite, a Gilead Company, Roche, Novartis,  
428 Bristol Myers Squibb/Celgene, and Miltenyi Biotech; research funding from Kite, a Gilead Company,  
429 Roche, Takeda, and Celgene; and travel support from Kite, a Gilead Company, Roche, Novartis and  
430 Miltenyi Biotech. All other authors declare that they have no competing interests.

### 431 ***Availability of data and materials***

432 Data will be made available upon reasonable request after an embargo period (i.e. after publishing  
433 our results) and subject to receiving relevant research questions. Due to the high sensitivity and  
434 privacy of the data we collect (protected by European law), we will only allow access to the data for  
435 a predefined time. Access will always be in accordance with informed consent and relevant national  
436 laws. For this study, the metadata about the study will be published in a public repository.

### 437 ***Acknowledgements***

438 Doctored Ltd ([www.doctored.org.uk](http://www.doctored.org.uk)) provided manuscript editing services for the final drafts.

439

## 440 REFERENCES

- 441 1 Dobosz P, Dzieciatkowski T. The Intriguing History of Cancer Immunotherapy. *Front Immunol* 2019;**10**:2965. doi:10.3389/fimmu.2019.02965
- 442
- 443 2 Herbst RS, Baas P, Kim DW, *et al.* Pembrolizumab versus docetaxel for previously treated, PD-L1-positive, advanced non-small-cell lung cancer (KEYNOTE-010): A randomised controlled trial. *The Lancet* 2016;**387**:1540–50. doi:10.1016/S0140-6736(15)01281-7
- 444
- 445
- 446 3 Hodi FS, O’Day SJ, McDermott DF, *et al.* Improved Survival with Ipilimumab in Patients with Metastatic Melanoma. *New England Journal of Medicine* 2010;**363**:711–23. doi:10.1056/nejmoa1003466
- 447
- 448
- 449 4 Rizvi NA, Mazières J, Planchard D, *et al.* Activity and safety of nivolumab, an anti-PD-1 immune checkpoint inhibitor, for patients with advanced, refractory squamous non-small-cell lung cancer (CheckMate 063): A phase 2, single-arm trial. *Lancet Oncol* 2015;**16**:257–65. doi:10.1016/S1470-2045(15)70054-9
- 450
- 451
- 452
- 453 5 Larkin J, Chiarion-Sileni V, Gonzalez R, *et al.* Five-Year Survival with Combined Nivolumab and Ipilimumab in Advanced Melanoma. *New England Journal of Medicine* 2019;**381**:1535–46. doi:10.1056/nejmoa1910836
- 454
- 455
- 456 6 Bourke JM, O’Sullivan M, Khattak MA. Management of adverse events related to new cancer immunotherapy (immune checkpoint inhibitors). *Med J Aust* 2016;**205**:418–24. doi:10.5694/mja16.00586
- 457
- 458
- 459 7 Magee DE, Hird AE, Klaassen Z, *et al.* Adverse event profile for immunotherapy agents compared with chemotherapy in solid organ tumors: a systematic review and meta-analysis of randomized clinical trials. *Annals of Oncology* 2020;**31**:50–60. doi:10.1016/j.annonc.2019.10.008
- 460
- 461
- 462
- 463 8 Cao JX, Wang H, Gao WJ, *et al.* The incidence of cytokine release syndrome and neurotoxicity of CD19 chimeric antigen receptor–T cell therapy in the patient with acute lymphoblastic leukemia and lymphoma. *Cytotherapy* 2020;**22**:214–26. doi:10.1016/j.jcyt.2020.01.015
- 464
- 465
- 466 9 Schubert ML, Schmitt M, Wang L, *et al.* Side-effect management of chimeric antigen receptor (CAR) T-cell therapy. *Annals of Oncology* 2021;**32**:34–48. doi:10.1016/j.annonc.2020.10.478
- 467
- 468
- 469 10 Hall ET, Singhal S, Dickerson J, *et al.* Patient-Reported Outcomes for Cancer Patients Receiving Checkpoint Inhibitors: Opportunities for Palliative Care—A Systematic Review. *J Pain Symptom Manage* 2019;**58**:137-156.e1. doi:10.1016/j.jpainsymman.2019.03.015
- 470
- 471 11 Abdel-Rahman O, Oweira H, Giryes A. Health-related quality of life in cancer patients treated with PD-(L)1 inhibitors: a systematic review. *Expert Rev Anticancer Ther* 2018;**18**:1231–9. doi:10.1080/14737140.2018.1528146
- 472
- 473

- 1  
2  
3 474 12 Ghisoni E, Wicky A, Bouchaab H, *et al.* Late-onset and long-lasting immune-related adverse  
4 475 events from immune checkpoint-inhibitors: An overlooked aspect in immunotherapy. *Eur J*  
5 476 *Cancer* 2021;**149**:153–64. doi:10.1016/j.ejca.2021.03.010  
7  
8 477 13 Dafni U, Tsourti Z, Vervita K, *et al.* Immune checkpoint inhibitors, alone or in combination  
9 478 with chemotherapy, as first-line treatment for advanced non-small cell lung cancer. A  
10 479 systematic review and network meta-analysis. *Lung Cancer* 2019;**134**:127–40.  
12 480 doi:10.1016/j.lungcan.2019.05.029  
13  
14 481 14 Yun S, Vincelette ND, Green MR, *et al.* Targeting immune checkpoints in unresectable  
15 482 metastatic cutaneous melanoma: a systematic review and meta-analysis of anti-CTLA-4 and  
16 483 anti-PD-1 agents trials. *Cancer Med* 2016;**5**:1481–91. doi:10.1002/cam4.732  
18  
19 484 15 Clarke E, Eriksen JG, Barrett S. The effects of PD-1/PD-L1 checkpoint inhibitors on  
20 485 recurrent/metastatic head and neck squamous cell carcinoma: a critical review of the  
21 486 literature and meta-analysis. *Acta Oncol (Madr)* 2021;**60**:1534–42.  
22 487 doi:10.1080/0284186X.2021.1964699  
24  
25 488 16 Pezeshki PS, Eskian M, Hamblin MR, *et al.* Immune checkpoint inhibition in classical hodgkin  
26 489 lymphoma. *Expert Rev Anticancer Ther* 2021;**21**:1003–16.  
27 490 doi:10.1080/14737140.2021.1918548  
29  
30 491 17 Wang M, Munoz J, Goy A, *et al.* KTE-X19 CAR T-Cell Therapy in Relapsed or Refractory  
31 492 Mantle-Cell Lymphoma. *New England Journal of Medicine* 2020;**382**:1331–42.  
32 493 doi:10.1056/nejmoa1914347  
34  
35 494 18 Locke FL, Ghobadi A, Jacobson CA, *et al.* Long-term safety and activity of axicabtagene  
36 495 ciloleucl in refractory large B-cell lymphoma (ZUMA-1): a single-arm, multicentre, phase 1–2  
37 496 trial. *Lancet Oncol* 2019;**20**:31–42. doi:10.1016/S1470-2045(18)30864-7  
38  
39 497 19 Munshi NC, Anderson LD, Shah N, *et al.* Idecabtagene Vicleucl in Relapsed and Refractory  
40 498 Multiple Myeloma. *New England Journal of Medicine* 2021;**384**:705–16.  
41 499 doi:10.1056/nejmoa2024850  
43  
44 500 20 Reck M, Rodríguez-Abreu D, Robinson AG, *et al.* Pembrolizumab versus Chemotherapy for  
45 501 PD-L1–Positive Non–Small-Cell Lung Cancer. *New England Journal of Medicine*  
46 502 2016;**375**:1823–33. doi:10.1056/nejmoa1606774  
47  
48 503 21 Sharma P, Allison JP. The future of immune checkpoint therapy. *Science* 2015;**348**:56–61.  
49 504 doi:10.1126/science.aaa8172  
51  
52 505 22 QUALITOP Project website. <https://h2020qualitop.liris.cnrs.fr/wordpress/>  
53  
54 506 23 Andresen EM, Meyers AR. Health-related quality of life outcomes measures. *Arch Phys Med*  
55 507 *Rehabil* 2000;**81**:30–45. doi:10.1053/apmr.2000.20621  
56  
57 508 24 Harris PA, Taylor R, Minor BL, *et al.* The REDCap consortium: Building an international  
58 509 community of software platform partners. *J Biomed Inform* 2019;**95**:103208.  
59 510 doi:10.1016/j.jbi.2019.103208  
60

- 1  
2  
3 511 25 Harris PA, Taylor R, Thielke R, *et al.* Research electronic data capture (REDCap)-A metadata-  
4 512 driven methodology and workflow process for providing translational research informatics  
5 513 support. *J Biomed Inform* 2009;**42**:377–81. doi:10.1016/j.jbi.2008.08.010  
6  
7  
8 514 26 Cancer Therapy Evaluation Program (CTEP). Common Terminology Criteria for Adverse Events  
9 515 (CTCAE).v.5.0. *Cancer Therapy Evaluation Program (CTEP)* 2017;:155.  
10  
11 516 27 Whetzel PL, Noy NF, Shah NH, *et al.* BioPortal: Enhanced functionality via new Web services  
12 517 from the National Center for Biomedical Ontology to access and use ontologies in software  
13 518 applications. *Nucleic Acids Res* 2011;**39**:541–5. doi:10.1093/nar/gkr469  
14  
15  
16 519 28 Eisenhauer EA, Therasse P, Bogaerts J, *et al.* New response evaluation criteria in solid  
17 520 tumours: Revised RECIST guideline (version 1.1). *Eur J Cancer* 2009;**45**:228–47.  
18 521 doi:10.1016/j.ejca.2008.10.026  
19  
20  
21 522 29 Cheson BD, Fisher RI, Barrington SF, *et al.* Recommendations for initial evaluation, staging,  
22 523 and response assessment of hodgkin and non-hodgkin lymphoma: The lugano classification.  
23 524 *Journal of Clinical Oncology* 2014;**32**:3059–67. doi:10.1200/JCO.2013.54.8800  
24  
25  
26 525 30 House JS. Social Support and Social Structure. *Sociological Forum* 1987;**2**:135–46.  
27  
28 526 31 Hirani SP, Patterson DLH, Newman SP. What do coronary artery disease patients think about  
29 527 their treatments?: An assessment of patients' treatment representations. *J Health Psychol*  
30 528 2008;**13**:311–22. doi:10.1177/1359105307088133  
31  
32 529 32 Cella BDF, Tulsky DS, Gray G, *et al.* Development and Validation of the General Measure.  
33 530 *Journal of Clinical Oncology* 1993;**11**:570–9.  
34  
35  
36 531 33 Bonomi AE, Cella DF, Hahn EA, *et al.* Multilingual translation of the functional assessment of  
37 532 cancer therapy (FACT) quality of life measurement system. *Quality of Life Research*  
38 533 1996;**5**:309–20. doi:10.1007/BF00433915  
39  
40 534 34 Cella D, Hernandez LP, Bonomi AE, *et al.* Spanish Language Translation and Initial Validation  
41 535 of the Functional Assessment of Cancer Therapy Quality-of-Life Instrument. *Med Care*  
42 536 1998;**36**:1407–18.  
43  
44  
45 537 35 Hlubocky FJ, Webster K, Cashy J, *et al.* The Development and Validation of a Measure of  
46 538 Health-Related Quality of Life for Non-Hodgkin's Lymphoma: The Functional Assessment of  
47 539 Cancer Therapy—Lymphoma (FACT-Lym). *Lymphoma* 2013;:147176.  
48 540 doi:10.1155/2013/147176  
49  
50  
51 541 36 Spinhoven PH, Ormel J, Sloekers PPA, *et al.* A validation study of the Hospital Anxiety and  
52 542 Depression Scale (HADS) in different groups of Dutch subjects. *Psychol Med* 1997;**27**:363–70.  
53 543 doi:10.1016/S0163-8343(03)00043-4  
54  
55  
56 544 37 Pais-Ribeiro J, Silva I, Ferreira T, *et al.* Validation study of a Portuguese version of the Hospital  
57 545 Anxiety and Depression Scale. *Psychol Health Med* 2007;**12**:225–37.  
58 546 doi:10.1080/13548500500524088  
59  
60

- 1  
2  
3 547 38 Razavi D, Delvaux N, Farvacques C, *et al.* Validation of the French version of the Hospital  
4 548 Anxiety and Depression Scale (HADS) in a population of hospitalized cancer patients. *Rev*  
5 549 *Psychol Appl* 1989;**39**:295–307.
- 6  
7  
8 550 39 Herrero MJ, Blanch J, Peri JM, *et al.* A validation study of the hospital anxiety and depression  
9 551 scale (HADS) in a Spanish population. *Gen Hosp Psychiatry* 2003;**25**:277–83.  
10 552 doi:10.1016/S0163-8343(03)00043-4
- 11  
12  
13 553 40 Breetvelt IS, Van Dam FSAM. Underreporting by cancer patients: The case of response-shift.  
14 554 *Soc Sci Med* 1991;**32**:981–7. doi:10.1016/0277-9536(91)90156-7
- 15  
16 555 41 Schwartz CE, Andresen EM, Nosek MA, *et al.* Response Shift Theory: Important Implications  
17 556 for Measuring Quality of Life in People With Disability. *Arch Phys Med Rehabil* 2007;**88**:529–  
18 557 36. doi:10.1016/j.apmr.2006.12.032
- 19  
20  
21 558 42 Schwartz CE, Sprangers MAG. Methodological approaches for assessing response shift in  
22 559 longitudinal health-related quality-of-life research. *Soc Sci Med* 1999;**48**:1531–48.  
23 560 doi:10.1016/S0277-9536(99)00047-7
- 24  
25 561 43 Sprangers MAG, Schwartz CE. Integrating response shift into health-related quality of life  
26 562 research: A theoretical model. *Soc Sci Med* 1999;**48**:1507–15. doi:10.1016/S0277-  
27 563 9536(99)00045-3
- 28  
29  
30 564 44 Carleton RN, Norton MAPJ, Asmundson GJG. Fearing the unknown: A short version of the  
31 565 Intolerance of Uncertainty Scale. *J Anxiety Disord* 2007;**21**:105–17.  
32 566 doi:10.1016/j.janxdis.2006.03.014
- 33  
34  
35 567 45 Ousseine YM, Durand MA, Bouhnik AD, *et al.* Multiple health literacy dimensions are  
36 568 associated with physicians' efforts to achieve shared decision-making. *Patient Educ Couns*  
37 569 2019;**102**:1949–56. doi:10.1016/j.pec.2019.05.015
- 38  
39  
40 570 46 Bishop WP, Craddock Lee SJ, Skinner CS, *et al.* Validity of single-item screening for limited  
41 571 health literacy in English and Spanish speakers. *Am J Public Health* 2016;**106**:889–92.  
42 572 doi:10.2105/AJPH.2016.303092
- 43  
44 573 47 Carpenter JR, Smuk M. Missing data: A statistical framework for practice. *Biometrical Journal*  
45 574 2021;**63**:915–47. doi:10.1002/bimj.202000196
- 46  
47  
48 575 48 Carpenter JR, Kenward MG. *Multiple imputation and its application*. Wiley 2013.
- 49  
50 576 49 Blake HA, Leyrat C, Mansfield KE, *et al.* Estimating treatment effects with partially observed  
51 577 covariates using outcome regression with missing indicators. *Biometrical Journal*  
52 578 2020;**62**:428–43. doi:10.1002/bimj.201900041
- 53  
54 579 50 Localio AR, Berlin JA, Ten Have TR, *et al.* Adjustments for center in multicenter studies: An  
55 580 overview. *Ann Intern Med* 2001;**135**:112–23. doi:10.7326/0003-4819-135-2-200107170-  
56 581 00012
- 57  
58  
59  
60

- 1  
2  
3 582 51 Rubin DB. Causal inference using potential outcomes: Design, modeling, decisions. *J Am Stat*  
4 583 *Assoc* 2005;**100**:322–31. doi:10.1198/016214504000001880
- 6 584 52 Robins JM, Hernán MÁ, Brumback B. Marginal structural models and causal inference in  
7 585 epidemiology. *Epidemiology* 2000;**11**:550–60. doi:10.1097/00001648-200009000-00011
- 10 586 53 Funk MJ, Westreich D, Wiesen C, *et al*. Doubly robust estimation of causal effects. *Am J*  
11 587 *Epidemiol* 2011;**173**:761–7. doi:10.1093/aje/kwq439
- 13 588 54 Schuler MS, Rose S. Targeted maximum likelihood estimation for causal inference in  
14 589 observational studies. *Am J Epidemiol* 2017;**185**:65–73. doi:10.1093/aje/kww165
- 17 590 55 Tennant PWG, Murray EJ, Arnold KF, *et al*. Use of directed acyclic graphs (DAGs) to identify  
18 591 confounders in applied health research: review and recommendations. *Int J Epidemiol*  
19 592 2021;**50**:620–32. doi:10.1093/ije/dyaa213
- 21 593 56 Mayr A, Hofner B. Boosting for statistical modelling-A non-technical introduction. *Stat*  
22 594 *Modelling* 2018;**18**:365–84. doi:10.1177/1471082X17748086
- 25 595 57 Nguyen TQ, Schmid I, Stuart EA. Clarifying causal mediation analysis for the applied  
26 596 researcher: Defining effects based on what we want to learn. *Psychol Methods*.  
27 597 2020;:10.1037/met0000299. doi:10.1037/met0000299
- 29 598 58 Strobl C, Malley J, Tutz G. An introduction to recursive partitioning: Rationale, application,  
30 599 and characteristics of classification and regression trees, bagging, and random forests.  
31 600 *Psychol Methods*. 2009;**14**:323–48. doi:10.1037/a0016973
- 34 601 59 Barbieri A, Peyhardi J, Conroy T, *et al*. Item response models for the longitudinal analysis of  
35 602 health-related quality of life in cancer clinical trials. *BMC Med Res Methodol* 2017;**17**:148.  
36 603 doi:10.1186/s12874-017-0410-9
- 39 604 60 Cuer B, Conroy T, Juzyna B, *et al*. Joint modelling with competing risks of dropout for  
40 605 longitudinal analysis of health-related quality of life in cancer clinical trials. *Quality of Life*  
41 606 *Research* 2022;**31**:1359-70. doi:10.1007/s11136-021-03040-8
- 43 607 61 Binder T, Vox A, Belyazid S, *et al*. Developing system dynamics models from causal loop  
44 608 diagrams. *Proceedings of the 22nd International Conference of the System Dynamic Society*  
45 609 2004;:1–21.
- 48 610 62 Wilkinson MD, Dumontier M, Aalbersberg IJ, *et al*. The FAIR Guiding Principles for scientific  
49 611 data management and stewardship. *Sci Data* 2016;**3**:160018. doi:10.1038/sdata.2016.18
- 51 612 63 von Elm E, Altman DG, Egger M, *et al*. The Strengthening the Reporting of Observational  
52 613 Studies in Epidemiology (STROBE) statement: guidelines for reporting observational studies. *J*  
53 614 *Clin Epidemiol* 2008;**61**:344–9. doi:10.1016/j.jclinepi.2007.11.008

56 615  
57  
58  
59 616  
60

1  
2  
3  
4 617 **FIGURE LEGENDS**  
5

6  
7 618 **Figure 1.** Structure of the QUALITOP project.  
8

9 619 **Figure 2.** Timeline of patient monitoring in the historic and prospective cohorts of the QUALITOP  
10  
11 620 project.  
12

13 621 **Figure 3.** Framework for the medical and psychosocial determinants of quality of life.  
14

15 622 **Figure 1.** Simplified representation of the architecture of the Smart Data Platform and its underlying  
16  
17 623 medical data lake.  
18  
19  
20  
21  
22  
23  
24  
25  
26  
27  
28  
29  
30  
31  
32  
33  
34  
35  
36  
37  
38  
39  
40  
41  
42  
43  
44  
45  
46  
47  
48  
49  
50  
51  
52  
53  
54  
55  
56  
57  
58  
59  
60

For peer review only

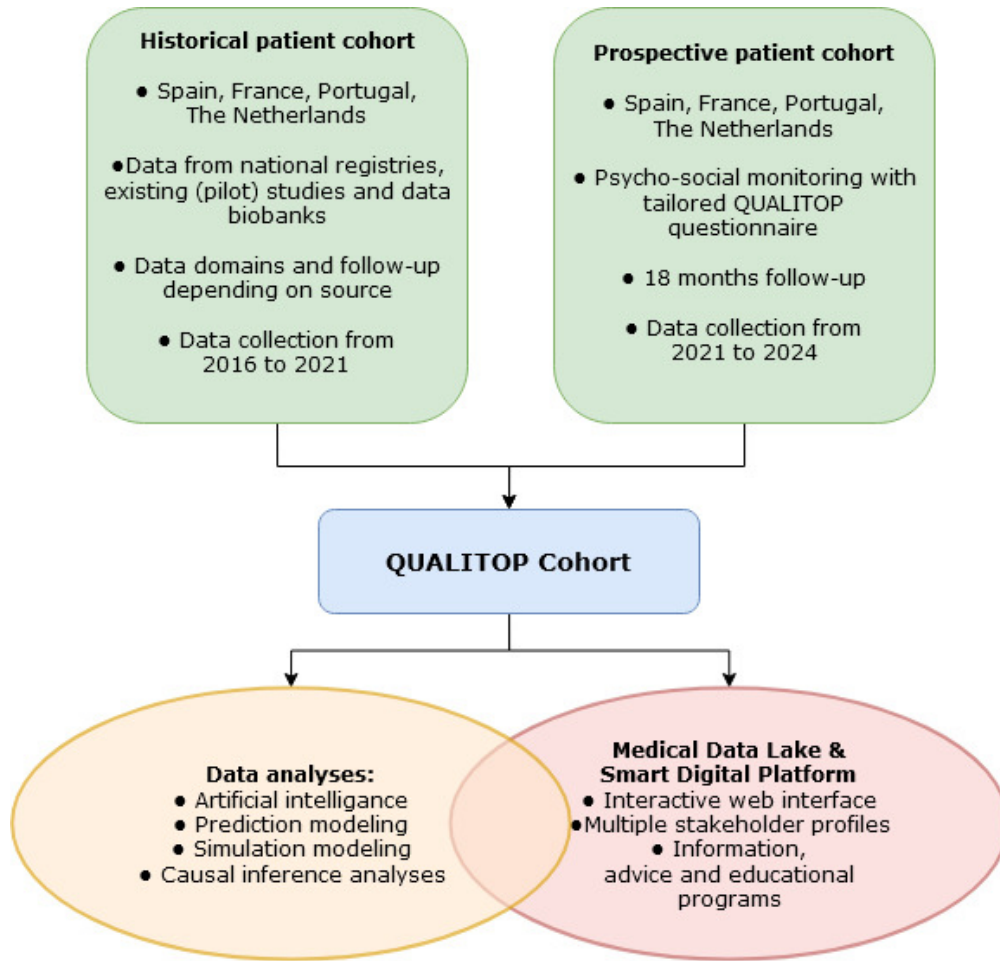

Structure of the QUALITOP project.

203x194mm (72 x 72 DPI)



1  
2  
3  
4  
5  
6  
7  
8  
9  
10  
11  
12  
13  
14  
15  
16  
17  
18  
19  
20  
21  
22  
23  
24  
25  
26  
27  
28  
29  
30  
31  
32  
33  
34  
35  
36  
37  
38  
39  
40  
41  
42  
43  
44  
45  
46  
47  
48  
49  
50  
51  
52  
53  
54  
55  
56  
57  
58  
59  
60

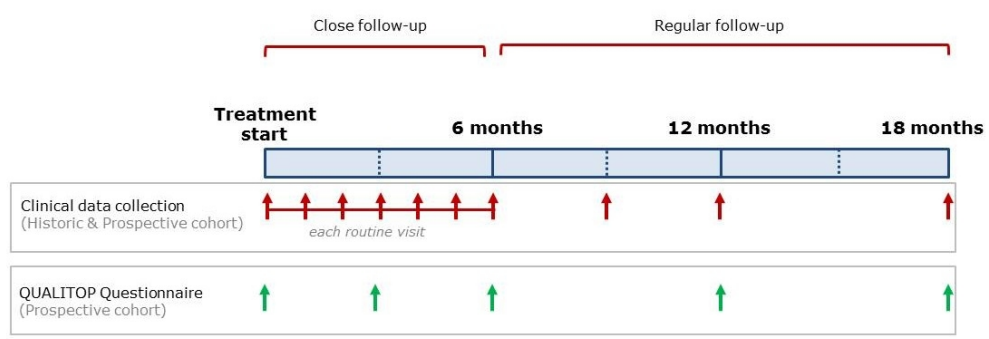

Timeline of patient monitoring in the historic and prospective cohorts of the QUALITOP project.

291x118mm (96 x 96 DPI)

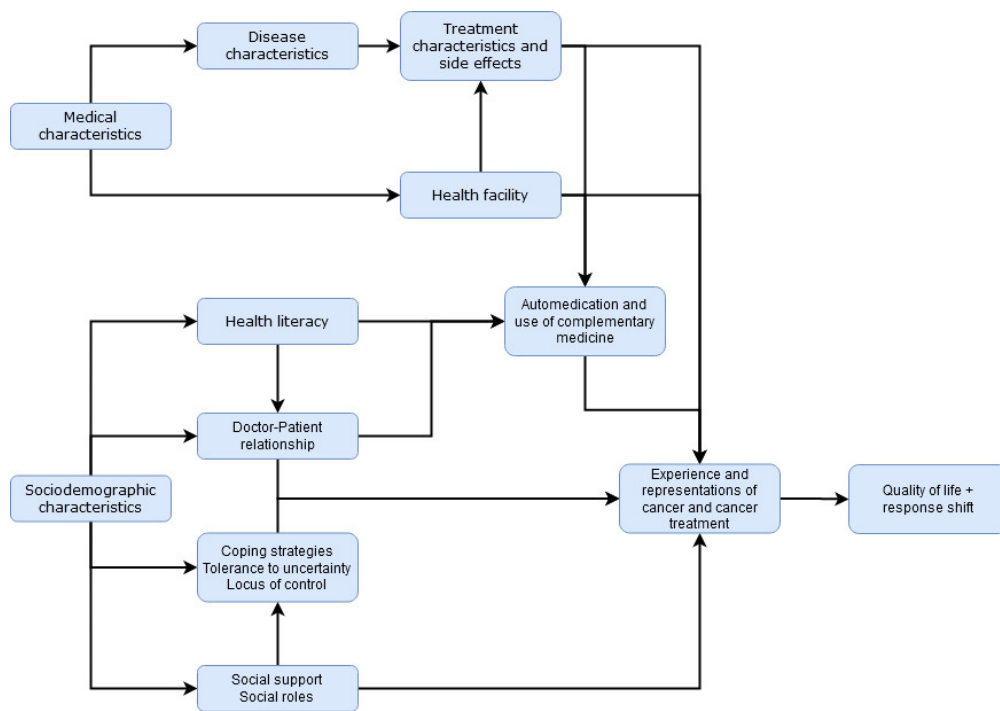

Framework for the medical and psychosocial determinants of quality of life.

307x215mm (72 x 72 DPI)

1  
2  
3  
4  
5  
6  
7  
8  
9  
10  
11  
12  
13  
14  
15  
16  
17  
18  
19  
20  
21  
22  
23  
24  
25  
26  
27  
28  
29  
30  
31  
32  
33  
34  
35  
36  
37  
38  
39  
40  
41  
42  
43  
44  
45  
46  
47  
48  
49  
50  
51  
52  
53  
54  
55  
56  
57  
58  
59  
60

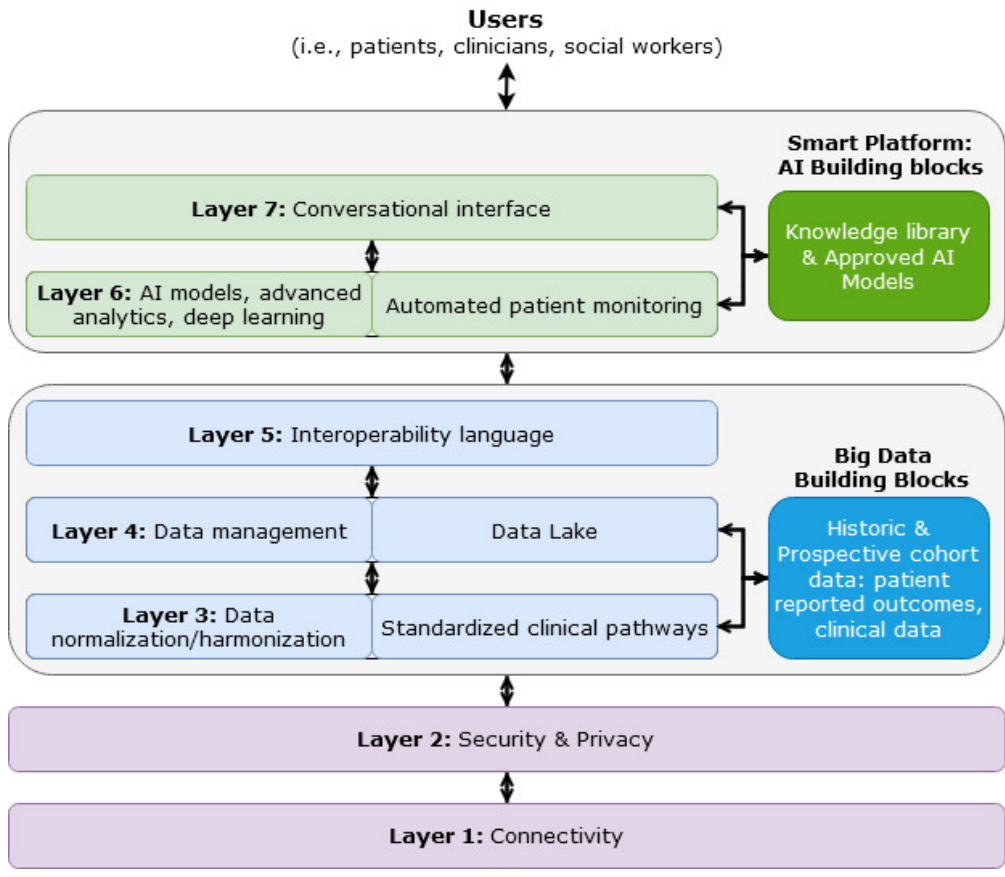

Simplified representation of the architecture of the Smart Data Platform and its underlying medical data lake.

219x189mm (72 x 72 DPI)

## Supplement 1: Data sources from each participating nation

### Data sources

Patient data for both the historic and prospective cohorts will come from various existing and new databases in France, the Netherlands, Portugal and Spain.

#### France

The QUALITOP cohort from France includes three historic and two prospective databases from Hospices Civils de Lyon (**Table 1**). The historic IMMUCARE ELDERLY cohort focused on clinical outcomes and irAEs after initiating ICI monotherapy or combination therapy between 2007 and 2019, with follow-up until late 2020. Data collected in the IMMUCARE BASE from 2019 in a clinical trial ('A Clinical and Biological Prospective Database of Patients Treated with Anticancer Immunotherapy and Follow-up of Their Immune-related Adverse Events irAE', registered NCT03989323 in clinicaltrials.gov) constitute the second historic cohort. This collected data for approximately 550 patients from the start of ICI treatment, irrespective of cancer type. Since August 2021, the study has included the QUALITOP quality of life questionnaires, demarcating the start of the prospective IMMUCARE BASE QUALITOP cohort. Earlier, in April 2021, the QoLD CART study began the prospective monitoring of HRQoL using the FACT-Lym for patients with diffuse large B-cell lymphoma receiving CAR T-cell therapy. Patients diagnosed with lymphoma who receive CAR T-cell therapy will be invited to a prospective QUALITOP cohort.

#### The Netherlands

We will include three historic and two prospective databases from the Netherlands. The OncoLifeS data biobank has collected data on clinical well-being and quality of life (assessed by EORTC-QLQ C30) since 2015 for patients with an oncological diagnosis treated in the University Medical Center Groningen.[29] Quality of life is monitored for 2 years after treatment and clinical outcomes are

1  
2  
3 monitored continuously. We extracted additional data on irAEs for a historic cohort of approximately  
4  
5 500 patients with lung cancer who received ICIs and will use the same processes to collect the  
6  
7 prospective data. Amsterdam University Medical Centers will lead the data collection for patients  
8  
9 treated with CAR T-cell therapy in the Netherlands from January 2020, using data from the  
10  
11 nationwide 'Follow that CAR' biobank initiated by the Dutch National CAR-T Tumor Board. This  
12  
13 biobank has prospectively monitored clinical outcomes and quality of life, using the FACT-Lym, for  
14  
15 patients with diffuse large B-cell lymphoma treated with CAR T-cell therapy. The historic cohort  
16  
17 comprises approximately 40 patients, and the same process will be used to collect the prospective  
18  
19 data. Lastly, the eQuiPe study collected data on quality of life for patients with advanced cancers in  
20  
21 the Netherlands and is linked to the Netherlands Cancer Registry. The data from this study are  
22  
23 included as a historic cohort.  
24  
25  
26  
27

## 28 Portugal

29  
30  
31 The Instituto Português de Oncologia in Lisboa invited patients diagnosed with lymphoma treated  
32  
33 with CAR T-cell therapy or ICIs to participate in the prospective QUALITOP cohort from the end of  
34  
35 2021 onwards. No historical patient data are available.  
36  
37  
38

## 39 Spain

40  
41  
42 The Hospital Clinic of Barcelona has asked patients treated for melanoma to consent to the inclusion  
43  
44 of their data in the "Xarxa de Melanoma de Catalunya" database since 2016. This database allows  
45  
46 participating centres to investigate phenotypic, genetic and disease evolution in patients, using  
47  
48 biomaterials, including DNA, stored in the "Colecció de la Unitat de melanoma" (IDIBAPS registry  
49  
50 code: R120904-090, National ISCIII registry code: C.0000334). Since January 2020, they have  
51  
52 collected data on clinical well-being and quality of life (assessed by EORTC-QLQ C30) for patients  
53  
54 with melanoma treated with ICIs. We have included approximately 50 patients in a historical  
55  
56 melanoma cohort and will use the same process for the prospective data collection.  
57  
58  
59  
60

1  
2  
3  
4  
5  
6  
7  
8  
9  
10  
11  
12  
13  
14  
15  
16  
17  
18  
19  
20  
21  
22  
23  
24  
25  
26  
27  
28  
29  
30  
31  
32  
33  
34  
35  
36  
37  
38  
39  
40  
41  
42  
43  
44  
45  
46  
47  
48  
49  
50  
51  
52  
53  
54  
55  
56  
57  
58  
59  
60

For peer review only

1 STROBE Statement—Checklist of items that should be included in reports of *cohort studies*

|                              | Item No | Recommendation                                                                                                                                                                                    |      |
|------------------------------|---------|---------------------------------------------------------------------------------------------------------------------------------------------------------------------------------------------------|------|
| Title and abstract           | 1       | (a) Indicate the study's design with a commonly used term in the title or the abstract                                                                                                            | ✓    |
|                              |         | (b) Provide in the abstract an informative and balanced summary of what was done and what was found                                                                                               | ✓    |
| <b>Introduction</b>          |         |                                                                                                                                                                                                   |      |
| Background/rationale         | 2       | Explain the scientific background and rationale for the investigation being reported                                                                                                              | ✓    |
| Objectives                   | 3       | State specific objectives, including any prespecified hypotheses                                                                                                                                  | ✓    |
| <b>Methods</b>               |         |                                                                                                                                                                                                   |      |
| Study design                 | 4       | Present key elements of study design early in the paper                                                                                                                                           | ✓    |
| Setting                      | 5       | Describe the setting, locations, and relevant dates, including periods of recruitment, exposure, follow-up, and data collection                                                                   | ✓    |
| Participants                 | 6       | (a) Give the eligibility criteria, and the sources and methods of selection of participants. Describe methods of follow-up                                                                        | ✓    |
|                              |         | (b) For matched studies, give matching criteria and number of exposed and unexposed                                                                                                               | N.A. |
| Variables                    | 7       | Clearly define all outcomes, exposures, predictors, potential confounders, and effect modifiers. Give diagnostic criteria, if applicable                                                          | ✓    |
| Data sources/<br>measurement | 8*      | For each variable of interest, give sources of data and details of methods of assessment (measurement). Describe comparability of assessment methods if there is more than one group              | ✓    |
| Bias                         | 9       | Describe any efforts to address potential sources of bias                                                                                                                                         | ✓    |
| Study size                   | 10      | Explain how the study size was arrived at                                                                                                                                                         | N.A. |
| Quantitative variables       | 11      | Explain how quantitative variables were handled in the analyses. If applicable, describe which groupings were chosen and why                                                                      | N.A. |
| Statistical methods          | 12      | (a) Describe all statistical methods, including those used to control for confounding                                                                                                             | ✓    |
|                              |         | (b) Describe any methods used to examine subgroups and interactions                                                                                                                               | N.A. |
|                              |         | (c) Explain how missing data were addressed                                                                                                                                                       | ✓    |
|                              |         | (d) If applicable, explain how loss to follow-up was addressed                                                                                                                                    | N.A. |
|                              |         | (e) Describe any sensitivity analyses                                                                                                                                                             | N.A. |
| <b>Results</b>               |         |                                                                                                                                                                                                   |      |
| Participants                 | 13*     | (a) Report numbers of individuals at each stage of study—eg numbers potentially eligible, examined for eligibility, confirmed eligible, included in the study, completing follow-up, and analysed | N.A. |
|                              |         | (b) Give reasons for non-participation at each stage                                                                                                                                              | N.A. |
|                              |         | (c) Consider use of a flow diagram                                                                                                                                                                | N.A. |
| Descriptive data             | 14*     | (a) Give characteristics of study participants (eg demographic, clinical, social) and information on exposures and potential confounders                                                          | N.A. |
|                              |         | (b) Indicate number of participants with missing data for each variable of interest                                                                                                               | N.A. |
|                              |         | (c) Summarise follow-up time (eg, average and total amount)                                                                                                                                       | N.A. |
| Outcome data                 | 15*     | Report numbers of outcome events or summary measures over time                                                                                                                                    | N.A. |
| Main results                 | 16      | (a) Give unadjusted estimates and, if applicable, confounder-adjusted estimates and their precision (eg, 95% confidence interval). Make clear                                                     | N.A. |

|                          |    |                                                                                                                                                                            |      |
|--------------------------|----|----------------------------------------------------------------------------------------------------------------------------------------------------------------------------|------|
|                          |    | which confounders were adjusted for and why they were included                                                                                                             |      |
|                          |    | (b) Report category boundaries when continuous variables were categorized                                                                                                  | N.A. |
|                          |    | (c) If relevant, consider translating estimates of relative risk into absolute risk for a meaningful time period                                                           | N.A. |
| Other analyses           | 17 | Report other analyses done—eg analyses of subgroups and interactions, and sensitivity analyses                                                                             | N.A. |
| <b>Discussion</b>        |    |                                                                                                                                                                            |      |
| Key results              | 18 | Summarise key results with reference to study objectives                                                                                                                   | N.A. |
| Limitations              | 19 | Discuss limitations of the study, taking into account sources of potential bias or imprecision. Discuss both direction and magnitude of any potential bias                 | N.A. |
| Interpretation           | 20 | Give a cautious overall interpretation of results considering objectives, limitations, multiplicity of analyses, results from similar studies, and other relevant evidence | N.A. |
| Generalisability         | 21 | Discuss the generalisability (external validity) of the study results                                                                                                      | N.A. |
| <b>Other information</b> |    |                                                                                                                                                                            |      |
| Funding                  | 22 | Give the source of funding and the role of the funders for the present study and, if applicable, for the original study on which the present article is based              | ✓    |

\*Give information separately for exposed and unexposed groups.

**Note:** An Explanation and Elaboration article discusses each checklist item and gives methodological background and published examples of transparent reporting. The STROBE checklist is best used in conjunction with this article (freely available on the Web sites of PLoS Medicine at <http://www.plosmedicine.org/>, Annals of Internal Medicine at <http://www.annals.org/>, and Epidemiology at <http://www.epidem.com/>). Information on the STROBE Initiative is available at <http://www.strobe-statement.org>.



# BMJ Open

## Monitoring multidimensional aspects of quality of life after cancer immunotherapy: protocol for the international multi-centre, observational QUALITOP cohort study

|                               |                                                                                                                                                                                                                                                                                                                                                                                                                                                                                                                                                                                                                                                                                                                                                                                                                                                                                                                                                                                                                                                                                                                                                                                                                                                                                                                                                                                                                                                                                                                                                                                                                                                                                                                                                                                                                                                                                                                                                                                                                                                                                                                                          |
|-------------------------------|------------------------------------------------------------------------------------------------------------------------------------------------------------------------------------------------------------------------------------------------------------------------------------------------------------------------------------------------------------------------------------------------------------------------------------------------------------------------------------------------------------------------------------------------------------------------------------------------------------------------------------------------------------------------------------------------------------------------------------------------------------------------------------------------------------------------------------------------------------------------------------------------------------------------------------------------------------------------------------------------------------------------------------------------------------------------------------------------------------------------------------------------------------------------------------------------------------------------------------------------------------------------------------------------------------------------------------------------------------------------------------------------------------------------------------------------------------------------------------------------------------------------------------------------------------------------------------------------------------------------------------------------------------------------------------------------------------------------------------------------------------------------------------------------------------------------------------------------------------------------------------------------------------------------------------------------------------------------------------------------------------------------------------------------------------------------------------------------------------------------------------------|
| Journal:                      | <i>BMJ Open</i>                                                                                                                                                                                                                                                                                                                                                                                                                                                                                                                                                                                                                                                                                                                                                                                                                                                                                                                                                                                                                                                                                                                                                                                                                                                                                                                                                                                                                                                                                                                                                                                                                                                                                                                                                                                                                                                                                                                                                                                                                                                                                                                          |
| Manuscript ID                 | bmjopen-2022-069090.R1                                                                                                                                                                                                                                                                                                                                                                                                                                                                                                                                                                                                                                                                                                                                                                                                                                                                                                                                                                                                                                                                                                                                                                                                                                                                                                                                                                                                                                                                                                                                                                                                                                                                                                                                                                                                                                                                                                                                                                                                                                                                                                                   |
| Article Type:                 | Protocol                                                                                                                                                                                                                                                                                                                                                                                                                                                                                                                                                                                                                                                                                                                                                                                                                                                                                                                                                                                                                                                                                                                                                                                                                                                                                                                                                                                                                                                                                                                                                                                                                                                                                                                                                                                                                                                                                                                                                                                                                                                                                                                                 |
| Date Submitted by the Author: | 08-Mar-2023                                                                                                                                                                                                                                                                                                                                                                                                                                                                                                                                                                                                                                                                                                                                                                                                                                                                                                                                                                                                                                                                                                                                                                                                                                                                                                                                                                                                                                                                                                                                                                                                                                                                                                                                                                                                                                                                                                                                                                                                                                                                                                                              |
| Complete List of Authors:     | <p>Vinke, Petra; University Medical Centre Groningen, Epidemiology<br/> Combalia, Marc; Institut d'Investigacions Biomediques August Pi i Sunyer; Universitat de Barcelona, Dermatology<br/> de Bock, Geertruida H.; University Medical Centre Groningen, Epidemiology<br/> Leyrat, Clémence; London School of Hygiene and Tropical Medicine, Medical Statistics<br/> Spanjaart, Anne; Amsterdam University Medical Centres, Hematology<br/> Dalle, Stephane; Cancer Research Center of Lyon, Lyon Sud Hospital, Dermatology; University Claude Bernard Lyon 1<br/> Gomes da Silva, Maria; Francisco Gentil Portuguese Institute for Oncology of Lisbon, Hematology<br/> Fouda Essongue, Aurore; Cancer Institute of the Hospices Civils de Lyon, ImmuCare<br/> Rabier, Aurélie; Cancer Institute of the Hospices Civils de Lyon, ImmuCare<br/> Pannard, Myriam; Lumière University Lyon 2 Psychology Institute, INSERM Unit U1296 Radiation: Defence, Health, Environment<br/> Jalali, Mohammad ; Harvard Medical School, MGH Institute for Technology Assessment<br/> Elgammal, Amal; Scientific Academy for Service Technology e.V. (ServTech); Egypt University of Informatics<br/> Papazoglou, Mike; Scientific Academy for Service Technology e.V. (ServTech); University of New South Wales School of Computer Science and Engineering<br/> Hacid, Mohand-Said; Université Claude Bernard Lyon 1, LIRIS, CNRS UMR 5205<br/> Rioufol, Catherine; Hospital Lyon-South, Clinical Oncology Pharmacy Department<br/> Kersten, Marie-José; Amsterdam University Medical Centres, Hematology<br/> van Oijen, Martijn; Amsterdam University Medical Centres, Medical Oncology, Cancer Center Amsterdam<br/> Suazo-Zepeda, Erick; University Medical Centre Groningen, Epidemiology<br/> Malhotra, Ananya; London School of Hygiene and Tropical Medicine Faculty of Epidemiology and Population Health<br/> Coquery, Emmanuel; Université Claude Bernard Lyon 1, LIRIS, CNRS UMR 5205<br/> Anota, Amélie; Centre Léon Bérard, Direction of Clinical Research and Innovation &amp; Human and Social Sciences; French National platform</p> |

|                                 |                                                                                                                                                                                                                                                                                                                                                                                                                                                                                                                                                                                                                                                                                                                                                                                                                                                                                                                                                                                                                 |
|---------------------------------|-----------------------------------------------------------------------------------------------------------------------------------------------------------------------------------------------------------------------------------------------------------------------------------------------------------------------------------------------------------------------------------------------------------------------------------------------------------------------------------------------------------------------------------------------------------------------------------------------------------------------------------------------------------------------------------------------------------------------------------------------------------------------------------------------------------------------------------------------------------------------------------------------------------------------------------------------------------------------------------------------------------------|
|                                 | <p>Quality of Life and Cancer<br/>         Preau, Marie; Lumière University Lyon 2 Psychology Institute, INSERM Unit U1296 Radiation: Defence, Health, Environment<br/>         Fauvernier, Mathieu; Hospices Civils de Lyon, Pôle Santé Publique, Service de Biostatistique et Bioinformatique; CNRS, UMR 5558, Laboratoire de Biométrie et Biologie Évolutive, Équipe Biostatistique-Santé<br/>         Coz, Elsa; Hospices Civils de Lyon, Pôle Santé Publique, Service de Biostatistique et Bioinformatique; CNRS, UMR 5558, Laboratoire de Biométrie et Biologie Évolutive, Équipe Biostatistique-Santé<br/>         Puig, Susana; Universitat de Barcelona, Dermatology; Centro de Investigación Biomédica en Red de Enfermedades Raras, Instituto de Salud Carlos III<br/>         Maucort-Boulch, Delphine; Hospices Civils de Lyon, Pôle Santé Publique, Service de Biostatistique et Bioinformatique; CNRS, UMR 5558, Laboratoire de Biométrie et Biologie Évolutive, Équipe Biostatistique-Santé</p> |
| <b>Primary Subject Heading</b>: | Oncology                                                                                                                                                                                                                                                                                                                                                                                                                                                                                                                                                                                                                                                                                                                                                                                                                                                                                                                                                                                                        |
| Secondary Subject Heading:      | Epidemiology, Haematology (incl blood transfusion), Oncology, Research methods                                                                                                                                                                                                                                                                                                                                                                                                                                                                                                                                                                                                                                                                                                                                                                                                                                                                                                                                  |
| Keywords:                       | Adverse events < THERAPEUTICS, ONCOLOGY, Epidemiology < ONCOLOGY                                                                                                                                                                                                                                                                                                                                                                                                                                                                                                                                                                                                                                                                                                                                                                                                                                                                                                                                                |
|                                 |                                                                                                                                                                                                                                                                                                                                                                                                                                                                                                                                                                                                                                                                                                                                                                                                                                                                                                                                                                                                                 |

SCHOLARONE™  
 Manuscripts

1  
2  
3 **1 Monitoring multidimensional aspects of quality of life after cancer immunotherapy: protocol for**  
4 **the international multi-centre, observational QUALITOP cohort study**  
5  
6  
7  
8  
9

10 P. C. Vinke<sup>1\*\*</sup>, M. Combalia<sup>2,3\*</sup>, G.H. de Bock<sup>1</sup>, C. Leyrat<sup>4</sup>, A.M. Spanjaart<sup>5</sup>, S. Dalle<sup>6,7,8</sup>, M. Gomes da Silva<sup>9</sup>, A.  
11 Fouda Essongue<sup>7</sup>, A. Rabier<sup>7</sup>, M. Pannard<sup>10</sup>, M.S. Jalali<sup>11</sup>, A. Elgammal<sup>12,13</sup>, M. Papazoglou<sup>12,14,15</sup>, M.S. Hacid<sup>16</sup>, C.  
12 Rioufol<sup>17</sup>, M.J. Kersten<sup>5</sup>, M.G.H. van Oijen<sup>18</sup>, E. Suazo-Zepeda<sup>1</sup>, A. Malhotra<sup>19</sup>, E. Coquery<sup>16</sup>, A. Anota<sup>20,21</sup>, M.  
13 Preau<sup>10</sup>, M. Fauvernier<sup>8,22,23</sup>, E. Coz<sup>8,22,23</sup>, S. Puig<sup>2,3,24,25</sup> #, D. Maucort-Boulch<sup>8,22,23</sup>

14  
15  
16  
17  
18 \*Contributed equally, # Corresponding author  
19  
20  
21

22 1. Department of Epidemiology, University Medical Center Groningen, University of Groningen, Groningen, The  
23 Netherlands  
24  
25

26 2. Dermatology Department, Hospital Clinic, Universitat de Barcelona, Barcelona, Spain  
27

28 3. Institut d'investigacions Biomèdiques August Pi i Sunyer (IDIBAPS), Barcelona, Spain  
29

30 4. Department of Medical Statistics & Inequalities in Cancer Outcomes Network, Faculty of Epidemiology and Population  
31 Health, London School of Hygiene and Tropical medicine, London, UK  
32

33 5. Department of Hematology, Amsterdam University Medical Centers, Cancer Center Amsterdam and LYMMCARE,  
34 Amsterdam, the Netherlands  
35  
36

37 6. Cancer Research Center of Lyon, Dermatology Department, Lyon Sud Hospital, Hospices Civils de Lyon, 69495 Pierre-  
38 Bénite, France  
39

40 7. ImmuCare (Immunology Cancer Research) Cancer Institute of the Hospices Civils de Lyon, 69229 Lyon, France  
41

42 8. Claude Bernard University Lyon 1, 69100 Villeurbanne, France  
43

44 9. Department of Hematology, Portuguese Institute of Oncology, Lisbon, Portugal  
45

46 10. INSERM Unit U1296 Radiation: Defence, Health, Environment, University Lumière Lyon 2, Institute of Psychology, Bron,  
47 France  
48

49 11. MGH Institute for Technology Assessment, Harvard Medical School, Boston, MA, USA  
50

51 12. Scientific Academy for Service Technology e.V. (ServTech), Behlertstr. 3a/Haus B2, 14467 Potsdam, Germany  
52

53 13. Egypt University of Informatics, New Administrative Capital, Cairo, Egypt  
54

55 14. University of New South Wales, School of Computer Science and Engineering, Sydney, NSW 2052, Australia  
56

57 15. Macquarie University, School of Computing, 4 Research Park Drive NSW 2109, Australia  
58

59 16. University Claude Bernard Lyon 1, LIRIS, CNRS UMR 5205, France  
60

- 1  
2  
3 31 17. Clinical Oncology Pharmacy Department, Hospital Lyon Sud, Cancer Institute of the Hospices Civils de Lyon (IC-HCL) -  
4  
5 32 EA3738 CICLY Lyon 1 University, Lyon, France  
6  
7 33 18. Department of Medical Oncology, Cancer Center Amsterdam, Amsterdam University Medical Centers, University of  
8  
9 34 Amsterdam, the Netherlands  
10  
11 35 19. Faculty of Epidemiology and Population Health, London School of Hygiene & Tropical Medicine, London, United  
12  
13 36 Kingdom  
14  
15 37 20. Direction of Clinical Research and Innovation & Human and Social Sciences, Centre Léon Bérard, Lyon, France  
16  
17 38 21. French National platform Quality of Life and Cancer, Lyon, France  
18  
19 39 22. Hospices Civils de Lyon, Pôle Santé Publique, Service de Biostatistique et Bioinformatique, F-69003, Lyon, France  
20  
21 40 23. CNRS, UMR 5558, Laboratoire de Biométrie et Biologie Évolutive, Équipe Biostatistique-Santé, F-69100, Villeurbanne,  
22  
23 41 France  
24  
25 42 24. University of Barcelona (UB), Barcelona, Spain  
26  
27 43 25. Centro de Investigación en Red de Enfermedades Raras (CIBERER), Instituto de Salud Carlos III, Barcelona, Spain  
28  
29 44

29 45 **Corresponding authors:**

30  
31 46 Susana Puig, MD, PhD  
32  
33 47 Chief, Dermatology Service  
34  
35 48 Dermatology Department, Hospital Clinic of Barcelona  
36  
37 49 Villarroel 170. 08036, Barcelona, Spain  
38  
39 50 Email: spuig@clinic.cat/susipuig@gmail.com  
40  
41 51 Tel.: +34 93 2275400 ext. 5692  
42  
43 52  
44  
45 53 Petra Vinke, PhD, epidemiologist  
46  
47 54 Department of Epidemiology (FA40), University Medical Center Groningen  
48  
49 55 Hanzeplein 1, PO box 30.001  
50  
51 56 9700 RB Groningen, the Netherlands  
52  
53 57 Email: p.c.vinke@umcg.nl  
54  
55 58 Tel.: +31 (0)50 361 7298  
56  
57 59

58 59 **Word count:** 3712  
59  
60

## 60 ABSTRACT

61 **Introduction:** Immunotherapies, such as immune checkpoint inhibitors and chimeric antigen  
62 receptor T-cell therapy, have significantly improved the clinical outcomes of various malignancies.  
63 However, they also cause immune-related adverse events (irAEs) that can be challenging to predict,  
64 prevent and treat. Although they likely interact with health-related quality of life (HRQoL), most  
65 existing evidence on this topic has come from clinical trials with eligibility criteria that may not  
66 accurately reflect real-world settings. The QUALITOP project will study HRQoL in relation to irAEs  
67 and its determinants in a real-world study of patients treated with immunotherapy.

68 **Methods and analysis:** This international, observational, multi-centre study takes place in France,  
69 the Netherlands, Portugal and Spain. We aim to include about 1800 adult cancer patients treated  
70 with immunotherapy in a specifically recruited prospective cohort, and to additionally obtain data  
71 from historical real-world databases (i.e. databiobanks) and medical administrative registries (i.e.  
72 national cancer registries) in which relevant data regarding other adult cancer patients treated with  
73 immunotherapy has already been stored. In the prospective cohort, clinical health status, HRQoL  
74 and psychosocial well-being will be monitored until 18 months after treatment initiation through  
75 questionnaires (at baseline and 3, 6, 12 and 18 months thereafter), and by data extraction from  
76 electronic patient files. Using advanced statistical methods, including causal inference methods,  
77 artificial intelligence algorithms and simulation modelling, we will use data from the QUALITOP  
78 cohort to improve the understanding of the complex relationships between treatment regimens,  
79 patient characteristics, irAEs and HRQoL.

80 **Ethics and dissemination:** All aspects of the QUALITOP project will be conducted in accordance with  
81 the Declaration of Helsinki and with ethical approval from a suitable local ethics committee, and all  
82 patients will provide signed informed consent. In addition to standard dissemination efforts in the  
83 scientific literature, the data and outcomes will contribute to a smart digital platform and medical  
84 data lake. These will (1) help increase knowledge about the impact of immunotherapy, (2) facilitate

1  
2  
3  
4  
5  
6  
7  
8  
9  
10  
11  
12  
13  
14  
15  
16  
17  
18  
19  
20  
21  
22  
23  
24  
25  
26  
27  
28  
29  
30  
31  
32  
33  
34  
35  
36  
37  
38  
39  
40  
41  
42  
43  
44  
45  
46  
47  
48  
49  
50  
51  
52  
53  
54  
55  
56  
57  
58  
59  
60

85 improved interactions between patients, clinicians and the general population, and (3) contribute to  
86 personalised medicine.

87 **Registration:** This study is registered at ClinicalTrials.gov under identifier NCT05626764.

For peer review only

1  
2  
3  
4 88 **Keywords**  
5  
6

7 89 Neoplasms, Immunotherapy, Quality of Life, Drug-related Side Effects and Adverse Reactions,  
8

9 90 Immune Check Point Inhibitors, Receptors, Chimeric Antigen  
10  
11  
12 91

13  
14 92 **Strengths and limitations of this study**  
15  
16

- 17  
18 93 • The QUALITOP project will create an international, multi-centre, real-world cohort that  
19  
20 94 aggregates data of multiple types and from multiple sources.  
21  
22 95 • The collected data will contribute to a medical data lake underlying a smart digital platform,  
23  
24 96 which may be used by various stakeholders.  
25  
26 97 • Despite its potential benefits, the QUALITOP project relies on data from heterogeneous patient  
27  
28 98 groups and from partly validated patient questionnaires.  
29  
30 99 • As this project started during the COVID-19 pandemic, we expect to limit recruitment shortage  
31  
32 100 by study extension and enrichment of historical databases with retrospective data.  
33  
34  
35  
36 101

## 102 INTRODUCTION

103 Cancer immunotherapy has revolutionised oncology care over the last two decades, adding to the  
104 existing therapeutic arsenal through its unique action in stimulating the immune system to recognise  
105 and attack cancer cells.[1] Two subtypes of immune intervention that have gained particular  
106 interest, namely immune checkpoint inhibitors (ICIs) and chimeric antigen receptor T cells (CAR T-  
107 cells), have hugely different mechanisms of action, indications and adverse events. Moreover, we  
108 lack long-term data on their health effects due to their relative novelty. International registries that  
109 monitor patient well-being in real-life settings provide invaluable opportunities to fill such  
110 knowledge gaps.

111 Immunotherapies trigger unique toxicities by activating the immune system to attack healthy cells.  
112 These immune-related adverse events (irAEs) occur in up to 96% of patients who receive ICIs, with  
113 severe irAEs reported in 10%–28% of patients receiving ICI monotherapy (Common Terminology  
114 Criteria for Adverse Events, grade  $\geq 3$ ) [2–5] and 59% of patients receiving combination therapy.[5]  
115 Dermatological, gastrointestinal and endocrine irAEs are most common, and management varies  
116 from symptomatic treatment for mild (grade 1–2) irAEs to corticosteroid or immunosuppressant  
117 (e.g., infliximab) treatment, or even permanent immunotherapy cessation, for life-threatening  
118 (grade 4) irAEs.[6] Nevertheless, toxicity profiles after ICI therapy appear more favourable than  
119 those of chemotherapy, with lower risks of developing any AEs or severe AEs (grade  $\geq 3$ ) for  
120 immunotherapy.[7] CAR T-cell therapy also causes various treatment-specific irAEs, with cytokine  
121 release syndrome, immune effector cell-associated neurotoxicity syndrome, infection and cytopenia  
122 the most common and severe in the acute phase (<28 days after CAR T-cell infusion).[8] Although  
123 irAEs can be life-threatening, they are usually reversible with early intervention. The most common  
124 long-term side effects are ongoing cytopenias, impaired immune reconstitution with B-cell aplasia,  
125 T-cell depletion and hypogammaglobulinemia with increased risk of infection.[9]  
126 Besides improved clinical outcomes, immunotherapy should offer the patient psychosocial benefits



1  
2  
3 127 compared with conventional therapies. To this end, trials have reported smaller impairments in  
4  
5 128 health-related quality of life (HRQoL), longer times to HRQoL deterioration and better control of  
6  
7 129 cancer symptoms.[10,11] However, immunotherapies and their associated irAEs may still affect  
8  
9 130 HRQoL given that we know little of their associated late-onset and long-lasting effects.[12]  
10  
11  
12 131 Moreover, although Immunotherapy has clear and proven benefits over conventional anticancer  
13  
14 132 treatments,[10,11,13–19] this evidence has predominantly come from clinical trials that have strict  
15  
16 133 eligibility criteria. These data may exclude patients with poor performance status (Eastern  
17  
18 134 Cooperative Oncology Group, performance status >1), concomitant cancers, auto-immune diseases  
19  
20 135 or long-term systemic corticosteroid use.[3,20] Therefore, we do not know if the clinical and  
21  
22 136 psychosocial benefits of immunotherapy in trial settings apply to real-world cohorts. The growth in  
23  
24 137 survivor populations as these treatments elicit durable clinical responses and long-term remission  
25  
26 138 for malignancies that previously had poor prognoses [21] emphasises the need for research into the  
27  
28 139 long-term well-being and HRQoL of patients treated with these therapies.

29  
30  
31  
32  
33 140 We aim to study the multidimensional aspects of patients' HRQoL, the irAEs that develop during ICI  
34  
35 141 and CAR T-cell therapy, and the relevant determinants of both, using a purpose-built smart digital  
36  
37 142 platform with a medical data lake. This digital platform will improve data provision to various stake  
38  
39 143 holders about risk profiles for irAE development or HRQoL deterioration. In this way, we can  
40  
41 144 improve personalised and shared decision making for future patients eligible for immunotherapy.

42  
43  
44  
45  
46

## 47 146 **METHODS AND ANALYSIS**

### 48 49 50 51 147 **Study design**

52  
53  
54 148 The '*Monitoring multidimensional aspects of **Quality of Life** after cancer **ImmunoTherapy**, an **Open***  
55  
56 149 *smart digital **Platform** for personalised prevention and patient management'* (QUALITOP) project is  
57  
58 150 an international, multi-centre, real-world, observational cohort study. We will provide insights into  
59  
60

1  
2  
3 151 the medical and psychosocial determinants of quality of life after cancer immunotherapy, making  
4  
5 152 use of big data analyses, artificial intelligence and simulation modelling, before integrating the  
6  
7 153 results in an information technology platform developed for the project. Additional information can  
8  
9  
10 154 be found on the project's website.[22] This study is registered at ClinicalTrials.gov under identifier  
11  
12 155 NCT05626764.

13  
14  
15 156 We will study adverse events and quality of life among patients with cancer during and after  
16  
17 157 immunotherapy. The QUALITOP cohort will combine a historical cohort of existing patients and a  
18  
19 158 prospective cohort enrolled specifically for this project (**Figure 1**). The historical cohort will comprise  
20  
21 159 patient data routinely collected in existing databases and medical registries in Spain, France,  
22  
23 160 Portugal and the Netherlands, for which existing informed consent allows the re-use of data within  
24  
25 161 the context of this European collaboration. For the prospective cohort, patients will be recruited in  
26  
27 162 the same countries under the coordination of Hospital Clinic de Barcelona (IDIBAPS), Hospices Civils  
28  
29 163 de Lyon, Instituto Português de Oncologia Lisboa, and Amsterdam University Medical Centers and  
30  
31 164 University Medical Center Groningen, respectively. **Figure 2** shows the study timeline. Note that  
32  
33 165 patients will not be included in both the historic and prospective cohorts.

### 34 35 36 37 38 166 **Patient selection**

39  
40  
41 167 Patients will be eligible for inclusion in a cohort if they are aged  $\geq 18$  years at the time of signing  
42  
43 168 informed consent and have an oncological diagnosis either treated or to be treated with ICIs or CAR  
44  
45 169 T-cells (as monotherapy or in combination with other anticancer treatments). Patients treated as  
46  
47 170 part of a clinical trial may also be included if permitted by the clinical trial. However, we will exclude  
48  
49 171 patients who are pregnant, under guardianship or who refuse to sign informed consent. For the  
50  
51 172 prospective cohort, patients can be recruited from the decision for immunotherapy until their  
52  
53 173 second cycle of immunotherapy. Patients receiving CAR T-cell therapy will be recruited from after  
54  
55 174 leukapheresis to the start of lymphodepleting chemotherapy, before CAR T-cell infusion. For the  
56  
57 175 prospective cohort, patients will be asked to participate by trained members of the medical staff,  
58  
59  
60

1  
2  
3 176 such as doctors and (research) nurses, during visits that are part of regular care. Based on the  
4  
5 177 average number of eligible patients treated in the participating clinical centres, we aim to include  
6  
7  
8 178 about 1800 patients in the prospective cohort.  
9

## 10 179 **Study outcomes**

11  
12  
13  
14 180 The primary outcome of the QUALITOP study is HRQoL, combining the patient's perspective of their  
15  
16 181 physical, psychological and social functioning.[23] We will measure this outcome repeatedly in the  
17  
18 182 prospective cohort and obtain data for a selection of patients and time points in the historic cohort.  
19  
20 183 The secondary outcome of the QUALITOP study is the incidence and severity of irAEs, which we will  
21  
22  
23 184 extract from the electronic records for patients in both cohorts.  
24  
25

## 26 185 **Data collection**

### 27 28 29 30 186 **Overview of data sources and timeline**

31  
32  
33 187 Patient data for both the historic and prospective cohorts will come from existing and new  
34  
35 188 databases at sites in France, the Netherlands, Portugal and Spain, as summarised in Table 1 and  
36  
37 189 detailed in Supplemental File 1. Each study site has different specialisations and will cover different  
38  
39  
40 190 oncological diagnoses and therapies.  
41

42 191

43  
44  
45 192  
46  
47  
48  
49  
50  
51  
52  
53  
54  
55  
56  
57  
58  
59  
60

193 **Table 1. Overview of data sources and their population characteristics per country**

| Study site                                                                                | Name of existing study/database | Cohort + period of data collection                    | Oncological diagnosis | Therapy              |
|-------------------------------------------------------------------------------------------|---------------------------------|-------------------------------------------------------|-----------------------|----------------------|
| <b>France</b>                                                                             |                                 |                                                       |                       |                      |
| <i>Hospices Civils de Lyon</i>                                                            | Immucare Elderly                | Historical (2007–2020)                                | Any solid tumour      | ICIs                 |
| <i>Hospices Civils de Lyon</i>                                                            | Immucare BASE                   | Historical (2019 onward)<br>Prospective (2021 onward) | Any solid tumour      | ICIs                 |
| <i>Hospices Civils de Lyon</i>                                                            | QoLD CART                       | Historical (2021 onward)                              | Lymphoma              | CAR T-cells          |
| <i>Hospices Civils de Lyon</i>                                                            | QUALITOP CART                   | Prospective (2022 onward)                             | Lymphoma              | CAR T-cells          |
| <b>The Netherlands</b>                                                                    |                                 |                                                       |                       |                      |
| <i>University Medical Center Groningen</i>                                                | OncolifeS                       | Historical (2015 onward)<br>Prospective (2021 onward) | Lung cancer           | ICIs                 |
| <i>Nationwide CAR-T cohort</i>                                                            | Follow that CAR                 | Historical (2020–2021)<br>Prospective (2021 onward)   | Lymphoma              | CAR T-cells          |
| <i>Nationwide Cancer Registry (IKNL)</i>                                                  | eQuiPe                          | Historical (2016–2020)                                | Any malignancy        | Any treatment        |
| <b>Portugal</b>                                                                           |                                 |                                                       |                       |                      |
| <i>Instituto Português de Oncologia, Lisboa</i>                                           | QUALITOP Lymphoma               | Prospective (2021 onward)                             | Lymphoma              | CAR T-cells,<br>ICIs |
| <b>Spain</b>                                                                              |                                 |                                                       |                       |                      |
| <i>Hospital Clinic de Barcelona (IDIBAPS)</i>                                             | Xarxa Melanoma                  | Historical (2020–2021)<br>Prospective (2021 onward)   | Melanoma              | ICIs                 |
| <i>Abbreviations: CAR, chimeric antigen receptor; ICIs, immune checkpoint inhibitors.</i> |                                 |                                                       |                       |                      |

194

195

196 **Figure 2** shows the proposed timeline of patient monitoring in the historic and prospective cohorts.

197 Data for eligible patients from the historic cohorts were collected between 2016 and 2021, while

198 patient inclusion for the prospective cohorts was initiated in April 2021 and will continue until

199 January 2023. Afterwards, inclusion is intended to be continued in a sustainability programme. We

200 will monitor patients closely for the first 6 months of treatment or until cessation, after which

201 patients will enter a phase of less intensive monitoring until 18 months after treatment initiation or

202 the QUALITOP project ends (**Figure 2**). Clinical data will be manually extracted from electronic

203 patient files for both cohorts. The QUALITOP questionnaire, which aims to collect data from various

204 psychosocial domains, will only be used in the prospective cohort.

## 205 Data collection in the prospective cohort

206 Except in France, data from the prospective arm of the cohort are being collected and managed in  
207 REDCap (Research Electronic Data Capture), hosted by the participating institutions.[24,25] REDCap  
208 is a secure, web-based platform designed to support data capture for research studies. It provides  
209 the following: 1) an intuitive interface for validated data capture; 2) audit trails for tracking data  
210 manipulation and export procedures; 3) automated export procedures for seamless data downloads  
211 to common statistical packages; and 4) procedures for data integration and interoperability with  
212 external sources. In France, data collection is being managed in Easily, a web-based electronic health  
213 record platform developed locally and hosted at Hospices Civils de Lyon. The database structure fits  
214 the common set of covariates in QUALITOP.

### 215 *Clinical data*

216 Clinical data will be manually extracted from electronic patient files for each routine visit in the first  
217 6 months of treatment and at fixed timepoints in the following year (9, 12 and 18 months). The  
218 timing of routine visits will differ by treatment type (ICI or CAR T-cell). We will assess medical history,  
219 medication use, prior anticancer treatments and cancer characteristics at the initiation of  
220 immunotherapy. Both at baseline and during follow-up, we will collect data from physical  
221 examinations (i.e., weight, performance status, blood pressure), laboratory assessments (i.e., C-  
222 reactive protein, neutrophils, leukocytes) and related to irAEs according to the Common  
223 Terminology Criteria for Adverse Events, version 5, of the National Cancer Institute.[26] Data about  
224 treatment for irAEs will be collected according to BioPortal's Drug Ontology,[27] available in REDCap.  
225 We will evaluate treatment response using the RECIST criteria for solid tumours [28] and the Lugano  
226 criteria for lymphomas.[29] Examples of data collected within the domains specified above can be  
227 found in Supplement 2.

### 228 *Psychosocial questionnaires*

1  
2  
3 229 We developed psychosocial questionnaires to assess the multiple dimensions of quality of life and its  
4  
5 230 potential psychosocial determinants in patients, necessary for the minimal data set of each patient  
6  
7 231 included in the prospective cohort. A more in-depth questionnaire is issued at baseline and a shorter  
8  
9 232 version is issued during follow-up at 3, 6, 12 and 18 months. We also modified the questionnaire  
10  
11 233 slightly for patients receiving CAR T-cell therapy. **Table 2** summarises the domains included in each  
12  
13 234 version of the questionnaire. The questionnaire as a whole was not pre-tested (because it was  
14  
15 235 constructed during the COVID-19 pandemic, and it was not possible to meet with patients).  
16  
17 236 However, it was reviewed by oncologists in all the countries involved in the data collection.  
18  
19 237 The flowchart in **Figure 3** illustrates the hypothesised framework for the interrelatedness of the  
20  
21 238 questionnaire domains and their association with quality of life. We created French, English,  
22  
23 239 Portuguese, Spanish and Dutch versions of the questionnaires, and when no validated translation  
24  
25 240 existed, an external service provider specialising in academic and medical translation completed the  
26  
27 241 translation. A researcher in each country also proofread the questionnaires, ensuring that the  
28  
29 242 English version was consistent with his/her language.  
30  
31  
32  
33  
34  
35  
36  
37  
38  
39  
40  
41  
42  
43  
44  
45  
46  
47  
48  
49  
50  
51  
52  
53  
54  
55  
56  
57  
58  
59  
60

245 **Table 2. QUALITOP questionnaire domains at baseline and during follow-up**

| Questionnaire domains                                                                                                                                                                                                                                                                                                                                | Source          | Baseline | Follow-up (3, 6, 12, 18 months) |
|------------------------------------------------------------------------------------------------------------------------------------------------------------------------------------------------------------------------------------------------------------------------------------------------------------------------------------------------------|-----------------|----------|---------------------------------|
| <b>Part 1: Personal and work situation</b>                                                                                                                                                                                                                                                                                                           |                 |          |                                 |
| <i>Sociodemographic factors (work, education, family and living situation)</i>                                                                                                                                                                                                                                                                       | Ad hoc items    | x        | *                               |
| <i>Gender roles</i>                                                                                                                                                                                                                                                                                                                                  | Ad hoc items    | x        | *                               |
| <i>Lifestyle (smoking, alcohol, physical activity, diet)</i>                                                                                                                                                                                                                                                                                         | Ad hoc items    | x        | *                               |
| <i>Family history of cancer</i>                                                                                                                                                                                                                                                                                                                      | Ad hoc items    | x        | *                               |
| <b>Part 2: Your everyday life</b>                                                                                                                                                                                                                                                                                                                    |                 |          |                                 |
| <i>Health-related Quality of Life</i>                                                                                                                                                                                                                                                                                                                | FACT-G/FACT-Lym | x        | x                               |
| <b>Part 3: How you are feeling</b>                                                                                                                                                                                                                                                                                                                   |                 |          |                                 |
| <i>Anxiety and depression</i>                                                                                                                                                                                                                                                                                                                        | HADS            | x        | x                               |
| <i>Intolerance to uncertainty</i>                                                                                                                                                                                                                                                                                                                    | IUS Short form  | x        |                                 |
| <b>Part 4: Your support network</b>                                                                                                                                                                                                                                                                                                                  |                 |          |                                 |
| <i>Social support</i>                                                                                                                                                                                                                                                                                                                                | Ad hoc items    | x        | x                               |
| <b>Part 5: Medication and treatment</b>                                                                                                                                                                                                                                                                                                              |                 |          |                                 |
| <i>Health literacy</i>                                                                                                                                                                                                                                                                                                                               |                 | x        |                                 |
| <i>Medication use and symptoms</i>                                                                                                                                                                                                                                                                                                                   | Ad hoc items #  | x        | x                               |
| <i>Medication beliefs</i>                                                                                                                                                                                                                                                                                                                            |                 | x        | x                               |
| <b>Part 6: Opinions on cancer treatment and care</b>                                                                                                                                                                                                                                                                                                 |                 |          |                                 |
| <i>Doctor-patient relationship</i>                                                                                                                                                                                                                                                                                                                   |                 | x        | x                               |
| <i>Treatment expectations</i>                                                                                                                                                                                                                                                                                                                        | Ad hoc items ## | x        | x                               |
| *only if changes occurred since baseline<br># adapted for CAR T-cell therapy recipients<br>## not included in the questionnaire for CAR T-cell therapy recipients<br>Abbreviations: FACT, Functional Assessment of Cancer Therapy (-G, general; -Lym, lymphoma); HADS, Hospital Anxiety and Depression Scale; IUS, Intolerance of Uncertainty Scale. |                 |          |                                 |

246

247 The first part of the questionnaire, issued at baseline, characterises the population based on

248 sociodemographic and psychosocial factors. Subsequently, the questionnaire includes assessments

249 of quality of life, anxiety, depression, (in)tolerance of uncertainty, social support, health literacy,

250 medication-related beliefs and behaviours, relationship with their main physician and expectations

251 of immunotherapy. The follow-up questionnaires will track longitudinal changes in these aspects.

252 Patients will be invited to signal any change in their personal situation every time they take the

1  
2  
3 253 questionnaire (e.g., patient stopped smoking, patient is now divorced, a new family member  
4  
5 254 diagnosed with cancer) and will be asked to complete the rest of the questionnaire at each  
6  
7  
8 255 assessment. We will assess these features using ad hoc items and established questionnaires.  
9  
10 256 Ad hoc items explore various features in the QUALITOP questionnaire. Ad-hoc items are used for  
11  
12 257 domains for which no suitable validated questions/questionnaires were available. The items are  
13  
14  
15 258 based on expert opinions and prior experience with research in similar patient populations.  
16  
17 259 Especially for domains 5 (“Medication and treatment”) and 6 (“Opinions on cancer treatment and  
18  
19 260 care”), clinicians’ knowledge and experience with immunotherapy treatment was of key importance  
20  
21 261 in developing and evaluating the ad hoc items.  
22  
23  
24 262 First, ad hoc items explore sociodemographic data (e.g., sex, age, number of children, marital  
25  
26 263 status), gender roles (e.g., health responsibilities in a relationship), health habits (e.g., smoking,  
27  
28 264 drinking, physical activity) and family history of cancer (e.g., number of family members who have or  
29  
30 265 have had cancer, whether patients underwent genetic testing for cancer). Second, they explore the  
31  
32 266 four main dimensions of social support [30] (material, informational, emotional, esteem) and how  
33  
34 267 patients feel that they are available and provided by their partners (if applicable), family members  
35  
36 268 and friends/loved ones. Third, they explore medication-related beliefs and behaviours, including  
37  
38 269 physical discomfort, medication use, number of doctors usually consulted outside cancer care, self-  
39  
40 270 medication, complementary care (e.g., physiotherapist, psychologist) and perception of so-called  
41  
42 271 ‘natural’ medicines and practices. Finally, they explore opinions about cancer treatment and care,  
43  
44 272 adapting items from the Treatment Representations Inventory [31] to immunotherapy for the  
45  
46 273 doctor-patient relationship, perception of the level of information provided and expected side  
47  
48 274 effects or outcomes.  
49  
50  
51  
52  
53 275 The Functional Assessment of Cancer Therapy–General (FACT-G),[32] suitable for patients with any  
54  
55 276 tumour type, will assess quality of life. This validated questionnaire has been widely used for this  
56  
57 277 purpose since the nineties.[33,34] The FACT-Lym, which includes 15 additional tailored questions,  
58  
59  
60



1  
2  
3 278 will then be used for patients with lymphoma.[35] We will use the authorised Dutch, French,  
4  
5 279 Portuguese and Spanish versions of each questionnaire.  
6  
7  
8 280 The validated Dutch, French, Portuguese and Spanish versions of the Hospital Anxiety and  
9  
10 281 Depression Scale (HADS) will be used to assess anxiety and depression longitudinally.[36–39] We aim  
11  
12 282 to observe indicators of deterioration in quality of life and/or a response-shift phenomenon (i.e.,  
13  
14 283 adaptation and adjustment to the disease that allows quality of life to remain equivalent despite the  
15  
16 284 illness).[40–43]  
17  
18  
19 285 Immunotherapy remains an innovative treatment associated with uncertain treatment outcomes  
20  
21 286 and side effects. Therefore, we will use the short version of the Intolerance of Uncertainty Scale (IUS  
22  
23 287 Short Form) to assess possible difficulties with the management of uncertain situations.[44]  
24  
25  
26 288 Health literacy, referring to the ability of individuals to access, understand, assess and use  
27  
28 289 information and services for health, will be assessed using the Single-Item Literacy Screener (SILS).  
29  
30 290 This has been validated in French and Spanish [45,46] and translated to Portuguese and Dutch. The  
31  
32 291 SILS aims to measure participants' functional literacy; that is, their ability to understand information  
33  
34 292 that might be necessary for their health.  
35  
36  
37  
38

### 39 293 Data collection in the historic cohort

40  
41  
42 294 For the historic databases, we aim to collect the same clinical data collected for patients in the  
43  
44 295 prospective cohort. For patient-reported psychosocial data, inclusion will depend on its availability in  
45  
46 296 each existing database. **Table 3** summarises the known data availability in the different historic  
47  
48 297 databases, by domain, for the baseline and follow-up data.  
49  
50  
51  
52  
53  
54  
55  
56  
57  
58  
59  
60

299 **Table 3. Data availability for historic databases**

|                                                                                                                                                                                                                                  | Immucare<br>Elderly | Immucare<br>Base | QoLD<br>CART | OncoLifeS | Follow<br>that CAR | eQuiPe | Xarxa<br>Melanoma |
|----------------------------------------------------------------------------------------------------------------------------------------------------------------------------------------------------------------------------------|---------------------|------------------|--------------|-----------|--------------------|--------|-------------------|
| <b>Baseline data</b>                                                                                                                                                                                                             |                     |                  |              |           |                    |        |                   |
| Lifestyle<br>(diet, alcohol, smoking)                                                                                                                                                                                            | ✓                   |                  |              | ✓         |                    |        | ✓                 |
| Family history                                                                                                                                                                                                                   |                     | ✓                |              | ✓         |                    |        | ✓                 |
| Sociodemographic factors                                                                                                                                                                                                         | ✓                   | ✓                |              | ✓         |                    |        |                   |
| Physical well-being<br>(frailty, activities of daily<br>living, performance<br>status)                                                                                                                                           | ✓                   | ✓                |              | ✓         | ✓                  |        |                   |
| HRQoL                                                                                                                                                                                                                            |                     |                  | ✓*           | ✓**       | ✓*/**              | ✓**    | ✓**               |
| Medical history                                                                                                                                                                                                                  | ✓                   | ✓                | ✓            | ✓         | ✓                  |        | ✓                 |
| Cancer characteristics<br>(diagnosis, staging, past<br>treatments)                                                                                                                                                               | ✓                   | ✓                |              | ✓         | ✓                  | ✓      | ✓                 |
| Laboratory assessments                                                                                                                                                                                                           | ✓                   | ✓                |              | ✓         | ✓                  |        |                   |
| Clinical assessments                                                                                                                                                                                                             | ✓                   | ✓                |              | ✓         | ✓                  |        | ✓                 |
| <b>Follow-up data</b>                                                                                                                                                                                                            |                     |                  |              |           |                    |        |                   |
| Lifestyle<br>(diet, alcohol, smoking)                                                                                                                                                                                            |                     |                  |              |           |                    |        |                   |
| Physical well-being<br>(frailty, activities of daily<br>living, performance<br>status)                                                                                                                                           |                     | ✓                |              |           | ✓                  |        |                   |
| HRQoL                                                                                                                                                                                                                            |                     |                  | ✓            | ✓         | ✓                  |        |                   |
| Laboratory assessments                                                                                                                                                                                                           |                     | ✓                |              | ✓         | ✓                  |        |                   |
| Clinical assessments                                                                                                                                                                                                             |                     | ✓                |              | ✓         | ✓                  |        | ✓                 |
| Adverse events                                                                                                                                                                                                                   | ✓                   | ✓                | ✓            | ✓         | ✓                  |        | ✓                 |
| Survival                                                                                                                                                                                                                         | ✓                   | ✓                | ✓            | ✓         | ✓                  | ✓      | ✓                 |
| *FACT-Lym (Functional Assessment of Cancer Therapy, lymphoma)                                                                                                                                                                    |                     |                  |              |           |                    |        |                   |
| ** EORTC-QLQ-C30                                                                                                                                                                                                                 |                     |                  |              |           |                    |        |                   |
| Abbreviations: EORTC-QLQ-C30, European Organization for Research and Treatment of Cancer core Quality of Life Questionnaire; FACT-Lym, Functional Assessment of Cancer Therapy, lymphoma; HRQoL, health-related quality of life. |                     |                  |              |           |                    |        |                   |

300

301

## 302 Data analysis plan

### 303 Data harmonisation and handling of missing data

304 To enable analyses with the data from the historical and/or prospective QUALITOP cohorts, we must  
305 first harmonise the generated data. Separate analyses may be required for the historical datasets  
306 given their heterogeneous structures. Although the structure of data to be collected for the  
307 prospective cohort has been harmonised beforehand, differences in patient populations, treatments  
308 and legislations between the five participating centres mean that differences will exist. Where these  
309 differences result in missing data, we will handle missingness separately for each analysis after  
310 careful consideration of the mechanism, paying close attention to associations between missingness,  
311 outcomes and exposures.[47] The method used will also depend on the nature of the statistical  
312 analysis, such as multiple imputation for regression-based methods [48] and the missing indicator  
313 approach for machine learning algorithms.[49] To capture heterogeneity between participating  
314 centres, we will include a centre effect in all the analyses as either fixed or random effects.[50]

### 315 Statistical analyses

316 We plan to use a broad variety of statistical methods for the purposes of description (e.g. describe  
317 baseline characteristics), explanation (e.g. explain changes in HRQoL by irAEs) and prediction (e.g.  
318 predict patients at risk for HRQoL deterioration through patient characteristics). In addition, we will  
319 use machine learning techniques and mapping methods to exploit fully the vast amount of collected  
320 data and provide a deep understanding of the causal mechanisms underlying HRQoL of patients  
321 treated with immunotherapy. A special focus lies on understanding the influence of adverse events  
322 and individual characteristics.

323 The observational nature of the data will require specific methodologies. We will use tools  
324 developed in the framework of the potential outcomes,[51] such as inverse-probability-of treatment  
325 weighting,[52] doubly robust estimators[53] and targeted maximum likelihood estimation,[54] to

1  
2  
3 326 account for confounding. Directed acyclic graphs,[55] informed by clinical frameworks like that  
4  
5 327 depicted in **Figure 3**, will be developed in collaboration with partners to inform variable selection.  
6  
7 328 These methods will help us to determine the causal effect of irAEs on HRQoL components.  
8  
9  
10 329 Intermediate analyses will be performed to identify the prognostic factors associated with irAEs, and  
11  
12 330 boosting methods [56] will be used to determine those factors and their appropriate functional  
13  
14 331 forms. The historical datasets will inform this step.

16  
17 332 To further address the relationships between irAEs and HRQoL, we will use mediation analysis to  
18  
19 333 disentangle the direct effect of individual characteristics and treatment on HRQoL, considering the  
20  
21 334 effect mediated by irAEs.[57] This should uncover the factors driving HRQoL and could subsequently  
22  
23 335 inform personalised care to maximise HRQoL. This stage will use machine learning algorithms, such  
24  
25 336 as random forests,[58] to develop a prediction model for future HRQoL based on current  
26  
27 337 demographic, psychosocial and clinical information.

28  
29  
30  
31 338 The data collected in the QUALITOP project will benefit from repeated assessments of HRQoL over  
32  
33 339 18 months, facilitating the study of both individual trajectories over time and the causes and timing  
34  
35 340 of changes in HRQoL. We will use mixed effect models and item response models to analyse the  
36  
37 341 repeated measurements,[59] while simultaneously considering joint modelling to account for death  
38  
39 342 as a competing event.[60]

40  
41  
42 343 We will then combine the outputs of the disparate analyses to develop a causal loop diagram to  
43  
44 344 illustrate the complex web of medical and psychosocial factors affecting quality of life [61]. This  
45  
46 345 diagram will inform the development and validation of a quantitative simulation model, using a  
47  
48 346 system dynamics method to understand HRQoL after cancer immunotherapy under different  
49  
50 347 hypothetical public health scenarios.

## 51 52 53 54 348 **Medical data lake and smart digital platform**

55  
56  
57  
58 349 The QUALITOP project also aims to develop data management principles in a smart digital platform  
59  
60

1  
2  
3 350 and associated medical data lake (**Figure 4**) that will enable networked medical agencies to share  
4  
5 351 and exchange trusted and secure medical data with automated and robust controls based on FAIR  
6  
7 352 (Findable, Accessible, Interoperable, Reusable) principles [62]. The digital platform will use the  
8  
9  
10 353 medical, psychological and psychosocial data collected in the historic and prospective QUALITOP  
11  
12 354 cohorts. By employing monitoring technologies and advanced data analytics, the data lake and smart  
13  
14 355 digital platform will allow for the determination of predictive markers in sub-populations associated  
15  
16 356 with irAE development and HRQoL impairment. We will use data-driven automation, prediction, and  
17  
18 357 decision support-analytics with technologies such as artificial intelligence (AI) to make predictions  
19  
20 358 and recommendations for a given set of operator-defined objectives. By leveraging modern analytics  
21  
22 359 and data management capabilities and working with AI methods such as machine learning to  
23  
24 360 improve the HRQoL of patients undergoing immunotherapy and to minimise the risks of relapse,  
25  
26 361 health care organisations can transform existing networks into smart digital health care ecosystems.

### 362 Patient monitoring using the smart digital platform

363 Finally, the smart digital platform aims to allow not only collaborative, integrated and personalised  
364 case monitoring but also actionable treatment adjustments or recommendations. These benefits will  
365 help reinforce treatment planning and improve the effectiveness of actions designed to reduce  
366 treatment effects, making room for the necessary corrective actions at different stages. Data from  
367 the historic Immucare database will be used to develop and test the clustering algorithms that will  
368 be integrated in the smart digital platform and used to simplify the data, look for patterns and  
369 similarities, and ultimately contribute to personalised patient monitoring.

370

### 371 Patient and public involvement

372 As 'experts by experience', patient representatives play a central role in reporting data on treatment  
373 outcomes, making their involvement key to the success of this project. Involvement will be

1  
2  
3 374 facilitated by embedding the QUALITOP project in the European Cancer Patients Coalition as a health  
4  
5 375 research project on big data and personalised medicine. This will provide invaluable opportunities to  
6  
7 376 gain input and advice from patients and their relatives. In addition, the QUALITOP project can be  
8  
9  
10 377 followed on twitter, through a regular dedicated newsletter and through online events for patients  
11  
12 378 with cancer. In the online meetings, researchers and partners of QUALITOP project can give a  
13  
14 379 comprehensive overview of the project and how it can improve the quality of life of patients. At the  
15  
16 380 same time, patients with cancer will have the opportunity to express their concerns, describe their  
17  
18 381 experiences and give valuable feedback regarding the project. Thus, we offer various routes for  
19  
20 382 proactive and reactive patient involvement to ensure that the research meets the needs and wishes  
21  
22  
23 383 of patients and their families. More detail about these routes to patient and public involvement can  
24  
25 384 be found at the following links:

- 28 385 • European Cancer Patients Coalition: <https://ecpc.org/health-and-research/qualitop/>
- 29  
30 386 • Twitter: @h2020qualitop
- 31  
32 387 • QUALITOP news and event: <https://h2020qualitop.liris.cnrs.fr/wordpress/index.php/>
- 33  
34 388 • QUALITOP LinkedIn: <https://www.linkedin.com/company/qualitop-h2020/>
- 35  
36  
37

38 389

## 40 390 **ETHICS AND DISSEMINATION**

### 43 391 **Ethical considerations**

44  
45  
46  
47 392 The QUALITOP project will be conducted according to the Declaration of Helsinki. The local ethics  
48  
49 393 committees of all participating centres have granted ethical approval (Personal protection  
50  
51 394 committee Hospices Civils de Lyon, Medical Ethics Committee University Medical Center Groningen,  
52  
53 395 Medical Ethics Committee Amsterdam University Medical Centers, Ethics Committee for Health  
54  
55 396 Instituto Português de Oncologia Lisboa, Ethics Committee Hospital Clinic of Barcelona) . Patients  
56  
57  
58 397 will be invited to participate by their treating physician and will be required to provide signed  
59  
60

1  
2  
3 398 informed consent. For the historic cohort, data from existing study databases and medical  
4  
5 399 administrative registries will only be used if patients had provided signed informed consent that  
6  
7 400 allowed the re-use of data for (international) scientific purposes. For analyses or dissemination  
8  
9 401 activities at both national and international level, data will be protected under the European General  
10  
11 402 Data Protection Regulation. The smart data platform and data lake will ensure privacy under the  
12  
13 403 Security Rule of the Health Insurance Portability and Accountability Act. Moreover, the data lake will  
14  
15 404 only include aggregated data, further ensuring anonymity.  
16  
17  
18  
19

## 20 405 **Dissemination**

21  
22  
23 406 Continuing from the strong patient and public involvement throughout the earlier stages of the  
24  
25 407 study, we will ensure that our results are not only presented at patient organisation meetings but  
26  
27 408 also distributed through national and social media. Furthermore, professional engagement will be  
28  
29 409 stimulated by presenting the study results at national and international conferences and by  
30  
31 410 submitting manuscripts to peer-reviewed scientific journals. All results will be reported following  
32  
33 411 current standards (e.g., STROBE guidelines).[63] The final product of the QUALITOP project, the  
34  
35 412 smart digital platform, will also play a central role in the dissemination of information to various  
36  
37 413 stakeholders, underpinned by a big medical data lake of aggregated data from the project's various  
38  
39 414 data sources. This platform will use secured portals that are accessible to each major stakeholder  
40  
41 415 group and will include functions and information tailored to their specific needs (**Table 4**).  
42  
43  
44  
45  
46  
47  
48  
49  
50  
51  
52  
53  
54  
55  
56  
57  
58  
59  
60

417 **Table 4. Specific outcomes expected by key stakeholder group**

| Stakeholder                                                                                       | Expected benefits                                                                                                                                                                                                                                                                                                                                                    |
|---------------------------------------------------------------------------------------------------|----------------------------------------------------------------------------------------------------------------------------------------------------------------------------------------------------------------------------------------------------------------------------------------------------------------------------------------------------------------------|
| <i>Patients</i>                                                                                   | <ul style="list-style-type: none"> <li>• Provide information and feedback on irAE risks, tips, recommendations and evidence-based results from up-to-date studies</li> <li>• Connections with peers (develop peer support) through a web-based platform</li> <li>• Provide education</li> <li>• Allow registration as participants to the QUALITOP cohort</li> </ul> |
| <i>Patients' relatives</i>                                                                        | <ul style="list-style-type: none"> <li>• Provide information about their relative's disease, treatment and irAEs (evidence-based results from up-to-date studies)</li> <li>• Ease connections with other relatives (similar to the peer support for patients)</li> </ul>                                                                                             |
| <i>Haematologists, oncologists and other healthcare providers</i>                                 | <ul style="list-style-type: none"> <li>• Provide information about irAEs, symptomatic treatments and patients' behaviour regarding self-treatment</li> </ul>                                                                                                                                                                                                         |
| <i>The general population</i>                                                                     | <ul style="list-style-type: none"> <li>• Provide information (metadata and syntheses of the most up-to-date information regarding HRQoL after cancer immunotherapy and its determinants)</li> <li>• Communicate policies and recommendations</li> </ul>                                                                                                              |
| <i>Scientists and policymakers</i>                                                                | <ul style="list-style-type: none"> <li>• Provide data-driven analysis functions and sharing of health economic data, conclusions and policies</li> </ul>                                                                                                                                                                                                             |
| <i>Abbreviations: HRQoL, health-related quality of life; irAE, immune-related adverse events.</i> |                                                                                                                                                                                                                                                                                                                                                                      |

418

419 **DISCUSSION**

420 The QUALITOP project aims to develop and implement a digital immunotherapy platform in Europe.

421 It will use big data analysis, AI and simulation modelling approaches to collect and aggregate real-

422 world HRQoL data, monitor patients' health statuses, conduct causal inference analyses, create

423 harm-reduction recommendations for patients and other stakeholders, and disseminate findings

424 efficiently and effectively. The planned data analyses should expand scientific knowledge about the

425 complex interplay between clinical factors, psychosocial factors and long-term quality of life in a

426 real-life setting after immunotherapy. Beyond this, we plan to use the acquired data and knowledge

427 to nourish a smart digital platform that should offer a host of benefits to various stakeholders. Of

428 course, we anticipate challenges on the path to achieving these outcomes. For example, the COVID-

429 19 pandemic has already affected patient inclusion in the QUALITOP cohorts. We hope to resolve

430 this with the received six-month extension from the European Union, as well as efforts to



1  
2  
3 431 retrospectively enrich the historical databases that are part of QUALITOP. Potential effects on  
4  
5 432 treatment regimens and HRQoL may need to be considered in the statistical analyses. We also  
6  
7 433 anticipate regulatory challenges for the smart digital platform, but by respecting the strict European  
8  
9 434 regulations that exist to ensure patient privacy, we expect to deliver this with little difficulty. The  
10  
11 435 QUALITOP project will expand knowledge about the health statuses and quality of life of patients  
12  
13 436 after treatment with either ICI or CAR T-cells in real-world settings, delivering a smart digital  
14  
15 437 platform that can empower cancer patients and inform health care providers. We hope that this  
16  
17 438 project will illustrate that, by making use of smart digital solutions, international collaborations can  
18  
19 439 accelerate the acquisition and dissemination of scientific knowledge surrounding cancer treatment.  
20  
21  
22  
23  
24 440  
25  
26  
27  
28  
29  
30  
31  
32  
33  
34  
35  
36  
37  
38  
39  
40  
41  
42  
43  
44  
45  
46  
47  
48  
49  
50  
51  
52  
53  
54  
55  
56  
57  
58  
59  
60

## 441 **DECLARATIONS**

### 442 ***Author Contributions***

443 PCV, MC, GHdB, CL, AMS, SD, MGdS, AFE, AR, MP, MSJ, AE, MP, MSH, CR, MJK, MGHvO, ESZ, AM, EC,  
444 AA, MP, MF, EC, SP and DMB have contributed to the conception and design of this study protocol.  
445 PCV, MC, GHdB, SP and DMB drafted the manuscript. PCV, MC, GHdB, CL, AMS, SD, MGdS, AFE, AR,  
446 MP, MSJ, AE, MP, MSH, CR, MJK, MGHvO, ESZ, AM, EC, AA, MP, MF, EC, SP and DMB have offered  
447 critical revision of the manuscript for important intellectual content. PCV, MC, GHdB, CL, AMS, SD,  
448 MGdS, AFE, AR, MP, MSJ, AE, MP, MSH, CR, MJK, MGHvO, ESZ, AM, EC, AA, MP, MF, EC, SP and DMB  
449 have read and approved the final manuscript.

### 450 ***Funding***

451 This project has received funding from the European Union's Horizon 2020 research and innovation  
452 programme under grant agreement N<sup>o</sup> 875171. Additionally, the UK Medical Research Council is  
453 supporting CL (Skills Development Fellowship, MR/T032448/1). The funding sources did not play a  
454 role in the design of the study, collection of data or writing of this protocol.

### 455 ***Competing interests***

456 MJK: honoraria from Kite, a Gilead Company, Novartis and Miltenyi Biotech, Roche, and Bristol  
457 Myers Squibb/Celgene; consultancy or advisory role for Kite, a Gilead Company, Roche, Novartis,  
458 Bristol Myers Squibb/Celgene, and Miltenyi Biotech; research funding from Kite, a Gilead Company,  
459 Roche, Takeda, and Celgene; and travel support from Kite, a Gilead Company, Roche, Novartis and  
460 Miltenyi Biotech. All other authors declare that they have no competing interests.

### 461 ***Availability of data and materials***

462 Data will be made available upon reasonable request after an embargo period (i.e. after publishing  
463 our results) and subject to receiving relevant research questions. Due to the high sensitivity and  
464 privacy of the data we collect (protected by European law), we will only allow access to the data for  
465 a predefined time. Access will always be in accordance with informed consent and relevant national

1  
2  
3 466 laws. For this study, the metadata about the study will be published in a public repository.  
4

5 467 ***Acknowledgements***  
6

7 468 Doctored Ltd ([www.doctored.org.uk](http://www.doctored.org.uk)) provided manuscript editing services for the final drafts.  
8  
9

10 469  
11  
12  
13  
14  
15  
16  
17  
18  
19  
20  
21  
22  
23  
24  
25  
26  
27  
28  
29  
30  
31  
32  
33  
34  
35  
36  
37  
38  
39  
40  
41  
42  
43  
44  
45  
46  
47  
48  
49  
50  
51  
52  
53  
54  
55  
56  
57  
58  
59  
60

For peer review only

## 470 REFERENCES

- 471 1 Dobosz P, Dzieciatkowski T. The Intriguing History of Cancer Immunotherapy. *Front Immunol* 2019;**10**:2965. doi:10.3389/fimmu.2019.02965
- 472
- 473 2 Herbst RS, Baas P, Kim DW, *et al.* Pembrolizumab versus docetaxel for previously treated, PD-L1-positive, advanced non-small-cell lung cancer (KEYNOTE-010): A randomised controlled trial. *The Lancet* 2016;**387**:1540–50. doi:10.1016/S0140-6736(15)01281-7
- 474
- 475
- 476 3 Hodi FS, O’Day SJ, McDermott DF, *et al.* Improved Survival with Ipilimumab in Patients with Metastatic Melanoma. *New England Journal of Medicine* 2010;**363**:711–23. doi:10.1056/nejmoa1003466
- 477
- 478
- 479 4 Rizvi NA, Mazières J, Planchard D, *et al.* Activity and safety of nivolumab, an anti-PD-1 immune checkpoint inhibitor, for patients with advanced, refractory squamous non-small-cell lung cancer (CheckMate 063): A phase 2, single-arm trial. *Lancet Oncol* 2015;**16**:257–65. doi:10.1016/S1470-2045(15)70054-9
- 480
- 481
- 482
- 483 5 Larkin J, Chiarion-Sileni V, Gonzalez R, *et al.* Five-Year Survival with Combined Nivolumab and Ipilimumab in Advanced Melanoma. *New England Journal of Medicine* 2019;**381**:1535–46. doi:10.1056/nejmoa1910836
- 484
- 485
- 486 6 Bourke JM, O’Sullivan M, Khattak MA. Management of adverse events related to new cancer immunotherapy (immune checkpoint inhibitors). *Med J Aust* 2016;**205**:418–24. doi:10.5694/mja16.00586
- 487
- 488
- 489 7 Magee DE, Hird AE, Klaassen Z, *et al.* Adverse event profile for immunotherapy agents compared with chemotherapy in solid organ tumors: a systematic review and meta-analysis of randomized clinical trials. *Annals of Oncology* 2020;**31**:50–60. doi:10.1016/j.annonc.2019.10.008
- 490
- 491
- 492
- 493 8 Cao JX, Wang H, Gao WJ, *et al.* The incidence of cytokine release syndrome and neurotoxicity of CD19 chimeric antigen receptor–T cell therapy in the patient with acute lymphoblastic leukemia and lymphoma. *Cytotherapy* 2020;**22**:214–26. doi:10.1016/j.jcyt.2020.01.015
- 494
- 495
- 496 9 Schubert ML, Schmitt M, Wang L, *et al.* Side-effect management of chimeric antigen receptor (CAR) T-cell therapy. *Annals of Oncology* 2021;**32**:34–48. doi:10.1016/j.annonc.2020.10.478
- 497
- 498 10 Hall ET, Singhal S, Dickerson J, *et al.* Patient-Reported Outcomes for Cancer Patients Receiving Checkpoint Inhibitors: Opportunities for Palliative Care—A Systematic Review. *J Pain Symptom Manage* 2019;**58**:137-156.e1. doi:10.1016/j.jpainsymman.2019.03.015
- 499
- 500
- 501 11 Abdel-Rahman O, Oweira H, Giryes A. Health-related quality of life in cancer patients treated with PD-(L)1 inhibitors: a systematic review. *Expert Rev Anticancer Ther* 2018;**18**:1231–9. doi:10.1080/14737140.2018.1528146
- 502
- 503

- 1  
2  
3 504 12 Ghisoni E, Wicky A, Bouchaab H, *et al.* Late-onset and long-lasting immune-related adverse  
4 505 events from immune checkpoint-inhibitors: An overlooked aspect in immunotherapy. *Eur J*  
5 506 *Cancer* 2021;**149**:153–64. doi:10.1016/j.ejca.2021.03.010  
7  
8 507 13 Dafni U, Tsourti Z, Vervita K, *et al.* Immune checkpoint inhibitors, alone or in combination  
9 508 with chemotherapy, as first-line treatment for advanced non-small cell lung cancer. A  
10 509 systematic review and network meta-analysis. *Lung Cancer* 2019;**134**:127–40.  
11 510 doi:10.1016/j.lungcan.2019.05.029  
13  
14 511 14 Yun S, Vincelette ND, Green MR, *et al.* Targeting immune checkpoints in unresectable  
15 512 metastatic cutaneous melanoma: a systematic review and meta-analysis of anti-CTLA-4 and  
16 513 anti-PD-1 agents trials. *Cancer Med* 2016;**5**:1481–91. doi:10.1002/cam4.732  
18  
19 514 15 Clarke E, Eriksen JG, Barrett S. The effects of PD-1/PD-L1 checkpoint inhibitors on  
20 515 recurrent/metastatic head and neck squamous cell carcinoma: a critical review of the  
21 516 literature and meta-analysis. *Acta Oncol (Madr)* 2021;**60**:1534–42.  
22 517 doi:10.1080/0284186X.2021.1964699  
24  
25 518 16 Pezeshki PS, Eskian M, Hamblin MR, *et al.* Immune checkpoint inhibition in classical hodgkin  
26 519 lymphoma. *Expert Rev Anticancer Ther* 2021;**21**:1003–16.  
27 520 doi:10.1080/14737140.2021.1918548  
29  
30 521 17 Wang M, Munoz J, Goy A, *et al.* KTE-X19 CAR T-Cell Therapy in Relapsed or Refractory  
31 522 Mantle-Cell Lymphoma. *New England Journal of Medicine* 2020;**382**:1331–42.  
32 523 doi:10.1056/nejmoa1914347  
34  
35 524 18 Locke FL, Ghobadi A, Jacobson CA, *et al.* Long-term safety and activity of axicabtagene  
36 525 ciloleucl in refractory large B-cell lymphoma (ZUMA-1): a single-arm, multicentre, phase 1–2  
37 526 trial. *Lancet Oncol* 2019;**20**:31–42. doi:10.1016/S1470-2045(18)30864-7  
38  
39 527 19 Munshi NC, Anderson LD, Shah N, *et al.* Idecabtagene Vicleucl in Relapsed and Refractory  
40 528 Multiple Myeloma. *New England Journal of Medicine* 2021;**384**:705–16.  
41 529 doi:10.1056/nejmoa2024850  
43  
44 530 20 Reck M, Rodríguez-Abreu D, Robinson AG, *et al.* Pembrolizumab versus Chemotherapy for  
45 531 PD-L1–Positive Non–Small-Cell Lung Cancer. *New England Journal of Medicine*  
46 532 2016;**375**:1823–33. doi:10.1056/nejmoa1606774  
47  
48 533 21 Sharma P, Allison JP. The future of immune checkpoint therapy. *Science* 2015;**348**:56–61.  
49 534 doi:10.1126/science.aaa8172  
51  
52 535 22 QUALITOP Project website. <https://h2020qualitop.liris.cnrs.fr/wordpress/>  
53  
54 536 23 Andresen EM, Meyers AR. Health-related quality of life outcomes measures. *Arch Phys Med*  
55 537 *Rehabil* 2000;**81**:30–45. doi:10.1053/apmr.2000.20621  
56  
57 538 24 Harris PA, Taylor R, Minor BL, *et al.* The REDCap consortium: Building an international  
58 539 community of software platform partners. *J Biomed Inform* 2019;**95**:103208.  
59 540 doi:10.1016/j.jbi.2019.103208  
60

- 1  
2  
3 541 25 Harris PA, Taylor R, Thielke R, *et al.* Research electronic data capture (REDCap)-A metadata-  
4 542 driven methodology and workflow process for providing translational research informatics  
5 543 support. *J Biomed Inform* 2009;**42**:377–81. doi:10.1016/j.jbi.2008.08.010  
6  
7  
8 544 26 Cancer Therapy Evaluation Program (CTEP). Common Terminology Criteria for Adverse Events  
9 545 (CTCAE).v.5.0. *Cancer Therapy Evaluation Program (CTEP)* 2017;:155.  
10  
11 546 27 Whetzel PL, Noy NF, Shah NH, *et al.* BioPortal: Enhanced functionality via new Web services  
12 547 from the National Center for Biomedical Ontology to access and use ontologies in software  
13 548 applications. *Nucleic Acids Res* 2011;**39**:541–5. doi:10.1093/nar/gkr469  
14  
15  
16 549 28 Eisenhauer EA, Therasse P, Bogaerts J, *et al.* New response evaluation criteria in solid  
17 550 tumours: Revised RECIST guideline (version 1.1). *Eur J Cancer* 2009;**45**:228–47.  
18 551 doi:10.1016/j.ejca.2008.10.026  
19  
20  
21 552 29 Cheson BD, Fisher RI, Barrington SF, *et al.* Recommendations for initial evaluation, staging,  
22 553 and response assessment of hodgkin and non-hodgkin lymphoma: The lugano classification.  
23 554 *Journal of Clinical Oncology* 2014;**32**:3059–67. doi:10.1200/JCO.2013.54.8800  
24  
25  
26 555 30 House JS. Social Support and Social Structure. *Sociological Forum* 1987;**2**:135–46.  
27  
28 556 31 Hirani SP, Patterson DLH, Newman SP. What do coronary artery disease patients think about  
29 557 their treatments?: An assessment of patients' treatment representations. *J Health Psychol*  
30 558 2008;**13**:311–22. doi:10.1177/1359105307088133  
31  
32 559 32 Cella BDF, Tulsky DS, Gray G, *et al.* Development and Validation of the General Measure.  
33 560 *Journal of Clinical Oncology* 1993;**11**:570–9.  
34  
35  
36 561 33 Bonomi AE, Cella DF, Hahn EA, *et al.* Multilingual translation of the functional assessment of  
37 562 cancer therapy (FACT) quality of life measurement system. *Quality of Life Research*  
38 563 1996;**5**:309–20. doi:10.1007/BF00433915  
39  
40  
41 564 34 Cella D, Hernandez LP, Bonomi AE, *et al.* Spanish Language Translation and Initial Validation  
42 565 of the Functional Assessment of Cancer Therapy Quality-of-Life Instrument. *Med Care*  
43 566 1998;**36**:1407–18.  
44  
45 567 35 Hlubocky FJ, Webster K, Cashy J, *et al.* The Development and Validation of a Measure of  
46 568 Health-Related Quality of Life for Non-Hodgkin's Lymphoma: The Functional Assessment of  
47 569 Cancer Therapy—Lymphoma (FACT-Lym). *Lymphoma* 2013;:147176.  
48 570 doi:10.1155/2013/147176  
49  
50  
51 571 36 Spinhoven PH, Ormel J, Sloekers PPA, *et al.* A validation study of the Hospital Anxiety and  
52 572 Depression Scale (HADS) in different groups of Dutch subjects. *Psychol Med* 1997;**27**:363–70.  
53 573 doi:10.1016/S0163-8343(03)00043-4  
54  
55  
56 574 37 Pais-Ribeiro J, Silva I, Ferreira T, *et al.* Validation study of a Portuguese version of the Hospital  
57 575 Anxiety and Depression Scale. *Psychol Health Med* 2007;**12**:225–37.  
58 576 doi:10.1080/13548500500524088  
59  
60

- 1  
2  
3 577 38 Razavi D, Delvaux N, Farvacques C, *et al.* Validation of the French version of the Hospital  
4 578 Anxiety and Depression Scale (HADS) in a population of hospitalized cancer patients. *Rev*  
5 579 *Psychol Appl* 1989;**39**:295–307.
- 7  
8 580 39 Herrero MJ, Blanch J, Peri JM, *et al.* A validation study of the hospital anxiety and depression  
9 581 scale (HADS) in a Spanish population. *Gen Hosp Psychiatry* 2003;**25**:277–83.  
10 582 doi:10.1016/S0163-8343(03)00043-4
- 12  
13 583 40 Breetvelt IS, Van Dam FSAM. Underreporting by cancer patients: The case of response-shift.  
14 584 *Soc Sci Med* 1991;**32**:981–7. doi:10.1016/0277-9536(91)90156-7
- 16  
17 585 41 Schwartz CE, Andresen EM, Nosek MA, *et al.* Response Shift Theory: Important Implications  
18 586 for Measuring Quality of Life in People With Disability. *Arch Phys Med Rehabil* 2007;**88**:529–  
19 587 36. doi:10.1016/j.apmr.2006.12.032
- 21  
22 588 42 Schwartz CE, Sprangers MAG. Methodological approaches for assessing response shift in  
23 589 longitudinal health-related quality-of-life research. *Soc Sci Med* 1999;**48**:1531–48.  
24 590 doi:10.1016/S0277-9536(99)00047-7
- 26  
27 591 43 Sprangers MAG, Schwartz CE. Integrating response shift into health-related quality of life  
28 592 research: A theoretical model. *Soc Sci Med* 1999;**48**:1507–15. doi:10.1016/S0277-  
29 593 9536(99)00045-3
- 31  
32 594 44 Carleton RN, Norton MAPJ, Asmundson GJG. Fearing the unknown: A short version of the  
33 595 Intolerance of Uncertainty Scale. *J Anxiety Disord* 2007;**21**:105–17.  
34 596 doi:10.1016/j.janxdis.2006.03.014
- 36  
37 597 45 Ousseine YM, Durand MA, Bouhnik AD, *et al.* Multiple health literacy dimensions are  
38 598 associated with physicians' efforts to achieve shared decision-making. *Patient Educ Couns*  
39 599 2019;**102**:1949–56. doi:10.1016/j.pec.2019.05.015
- 41  
42 600 46 Bishop WP, Craddock Lee SJ, Skinner CS, *et al.* Validity of single-item screening for limited  
43 601 health literacy in English and Spanish speakers. *Am J Public Health* 2016;**106**:889–92.  
44 602 doi:10.2105/AJPH.2016.303092
- 46  
47 603 47 Carpenter JR, Smuk M. Missing data: A statistical framework for practice. *Biometrical Journal*  
48 604 2021;**63**:915–47. doi:10.1002/bimj.202000196
- 50  
51 605 48 Carpenter JR, Kenward MG. *Multiple imputation and its application*. Wiley 2013.
- 52  
53 606 49 Blake HA, Leyrat C, Mansfield KE, *et al.* Estimating treatment effects with partially observed  
54 607 covariates using outcome regression with missing indicators. *Biometrical Journal*  
55 608 2020;**62**:428–43. doi:10.1002/bimj.201900041
- 57  
58 609 50 Localio AR, Berlin JA, Ten Have TR, *et al.* Adjustments for center in multicenter studies: An  
59 610 overview. *Ann Intern Med* 2001;**135**:112–23. doi:10.7326/0003-4819-135-2-200107170-  
60 611 00012

- 1  
2  
3 612 51 Rubin DB. Causal inference using potential outcomes: Design, modeling, decisions. *J Am Stat*  
4 613 *Assoc* 2005;**100**:322–31. doi:10.1198/016214504000001880
- 6 614 52 Robins JM, Hernán MÁ, Brumback B. Marginal structural models and causal inference in  
8 615 epidemiology. *Epidemiology* 2000;**11**:550–60. doi:10.1097/00001648-200009000-00011
- 10 616 53 Funk MJ, Westreich D, Wiesen C, *et al*. Doubly robust estimation of causal effects. *Am J*  
11 617 *Epidemiol* 2011;**173**:761–7. doi:10.1093/aje/kwq439
- 13 618 54 Schuler MS, Rose S. Targeted maximum likelihood estimation for causal inference in  
14 619 observational studies. *Am J Epidemiol* 2017;**185**:65–73. doi:10.1093/aje/kww165
- 17 620 55 Tennant PWG, Murray EJ, Arnold KF, *et al*. Use of directed acyclic graphs (DAGs) to identify  
18 621 confounders in applied health research: review and recommendations. *Int J Epidemiol*  
19 622 2021;**50**:620–32. doi:10.1093/ije/dyaa213
- 21 623 56 Mayr A, Hofner B. Boosting for statistical modelling-A non-technical introduction. *Stat*  
23 624 *Modelling* 2018;**18**:365–84. doi:10.1177/1471082X17748086
- 25 625 57 Nguyen TQ, Schmid I, Stuart EA. Clarifying causal mediation analysis for the applied  
26 626 researcher: Defining effects based on what we want to learn. *Psychol Methods*.  
27 627 2020;:10.1037/met0000299. doi:10.1037/met0000299
- 29 628 58 Strobl C, Malley J, Tutz G. An introduction to recursive partitioning: Rationale, application,  
31 629 and characteristics of classification and regression trees, bagging, and random forests.  
32 630 *Psychol Methods*. 2009;**14**:323–48. doi:10.1037/a0016973
- 34 631 59 Barbieri A, Peyhardi J, Conroy T, *et al*. Item response models for the longitudinal analysis of  
35 632 health-related quality of life in cancer clinical trials. *BMC Med Res Methodol* 2017;**17**:148.  
37 633 doi:10.1186/s12874-017-0410-9
- 39 634 60 Cuer B, Conroy T, Juzyna B, *et al*. Joint modelling with competing risks of dropout for  
40 635 longitudinal analysis of health-related quality of life in cancer clinical trials. *Quality of Life*  
41 636 *Research* 2022;**31**:1359-70. doi:10.1007/s11136-021-03040-8
- 43 637 61 Binder T, Vox A, Belyazid S, *et al*. Developing system dynamics models from causal loop  
45 638 diagrams. *Proceedings of the 22nd International Conference of the System Dynamic Society*  
46 639 2004;:1–21.
- 48 640 62 Wilkinson MD, Dumontier M, Aalbersberg IJJ, *et al*. The FAIR Guiding Principles for scientific  
49 641 data management and stewardship. *Sci Data* 2016;**3**:160018. doi:10.1038/sdata.2016.18
- 51 642 63 von Elm E, Altman DG, Egger M, *et al*. The Strengthening the Reporting of Observational  
53 643 Studies in Epidemiology (STROBE) statement: guidelines for reporting observational studies. *J*  
54 644 *Clin Epidemiol* 2008;**61**:344–9. doi:10.1016/j.jclinepi.2007.11.008

56 645  
57  
58  
59 646  
60



1  
2  
3  
4 647 **FIGURE LEGENDS**  
5

6  
7 648 **Figure 1.** Structure of the QUALITOP project.  
8

9 649 **Figure 2.** Timeline of patient monitoring in the historic and prospective cohorts of the QUALITOP  
10  
11 650 project.  
12

13 651 **Figure 3.** Framework for the medical and psychosocial determinants of quality of life.  
14

15 652 **Figure 1.** Simplified representation of the architecture of the Smart Data Platform and its underlying  
16  
17 653 medical data lake.  
18  
19  
20  
21  
22  
23  
24  
25  
26  
27  
28  
29  
30  
31  
32  
33  
34  
35  
36  
37  
38  
39  
40  
41  
42  
43  
44  
45  
46  
47  
48  
49  
50  
51  
52  
53  
54  
55  
56  
57  
58  
59  
60

For peer review only

1  
2  
3  
4  
5  
6  
7  
8  
9  
10  
11  
12  
13  
14  
15  
16  
17  
18  
19  
20  
21  
22  
23  
24  
25  
26  
27  
28  
29  
30  
31  
32  
33  
34  
35  
36  
37  
38  
39  
40  
41  
42  
43  
44  
45  
46  
47  
48  
49  
50  
51  
52  
53  
54  
55  
56  
57  
58  
59  
60

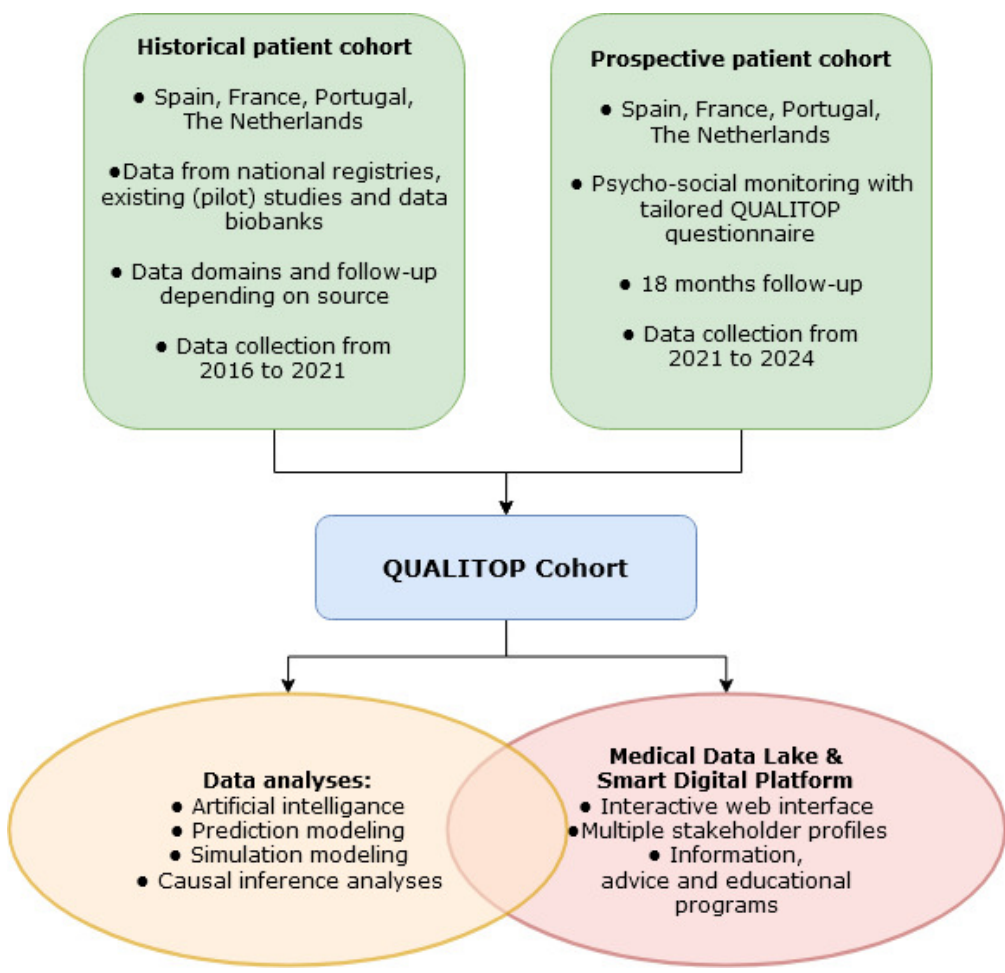

Structure of the QUALITOP project.

203x194mm (72 x 72 DPI)

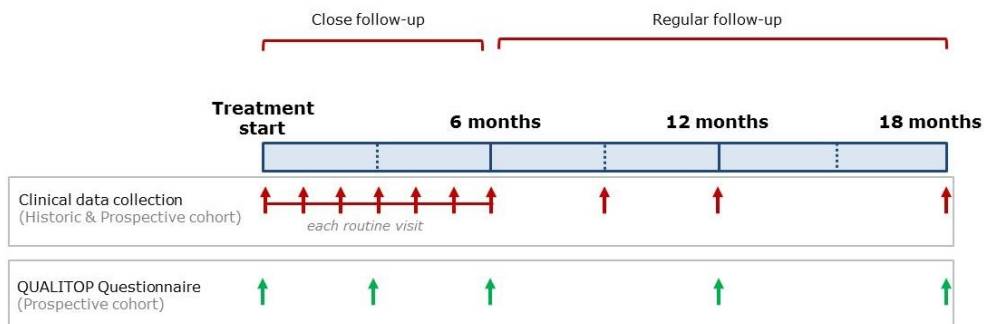

Timeline of patient monitoring in the historic and prospective cohorts of the QUALITOP project.

291x118mm (96 x 96 DPI)

1  
2  
3  
4  
5  
6  
7  
8  
9  
10  
11  
12  
13  
14  
15  
16  
17  
18  
19  
20  
21  
22  
23  
24  
25  
26  
27  
28  
29  
30  
31  
32  
33  
34  
35  
36  
37  
38  
39  
40  
41  
42  
43  
44  
45  
46  
47  
48  
49  
50  
51  
52  
53  
54  
55  
56  
57  
58  
59  
60

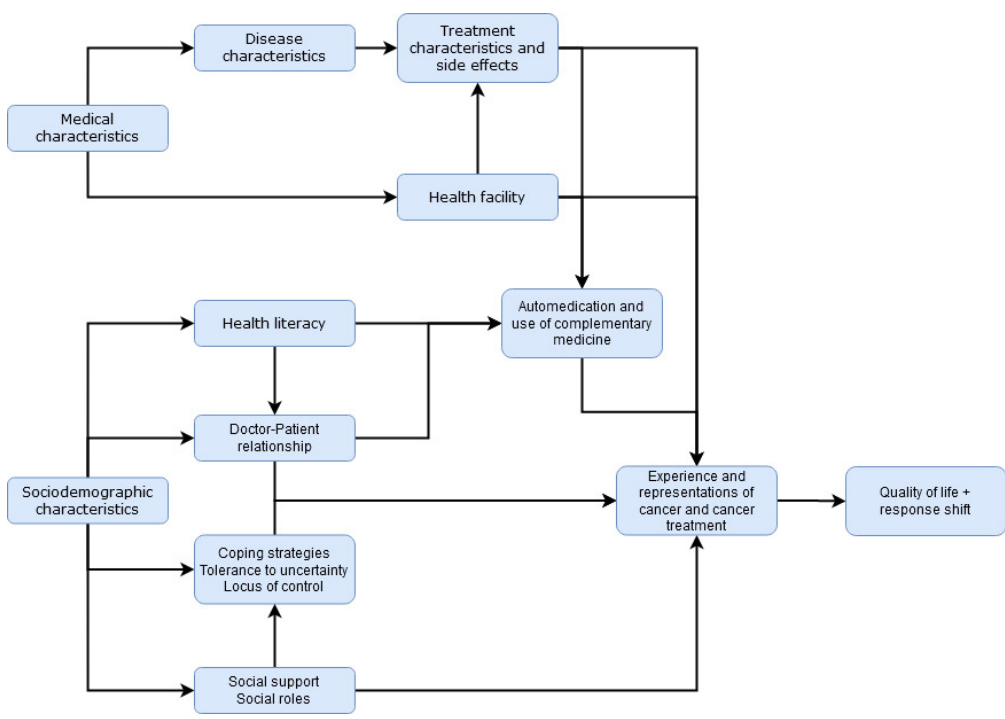

Framework for the medical and psychosocial determinants of quality of life.

307x215mm (72 x 72 DPI)

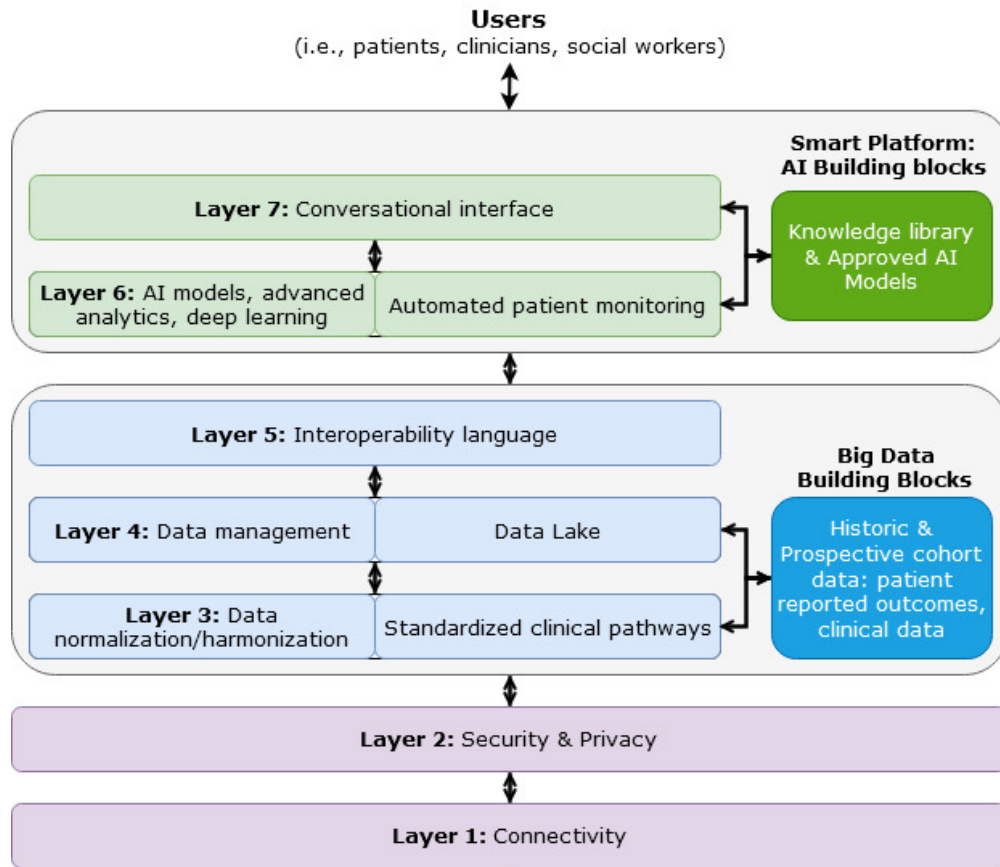

Simplified representation of the architecture of the Smart Data Platform and its underlying medical data lake.

219x189mm (72 x 72 DPI)

## Supplement 1: Data sources from each participating nation

### Data sources

Patient data for both the historic and prospective cohorts will come from various existing and new databases in France, the Netherlands, Portugal and Spain.

#### France

The QUALITOP cohort from France includes three historic and two prospective databases from Hospices Civils de Lyon (**Table 1**). The historic IMMUCARE ELDERLY cohort focused on clinical outcomes and irAEs after initiating ICI monotherapy or combination therapy between 2007 and 2019, with follow-up until late 2020. Data collected in the IMMUCARE BASE from 2019 in a clinical trial ('A Clinical and Biological Prospective Database of Patients Treated with Anticancer Immunotherapy and Follow-up of Their Immune-related Adverse Events irAE', registered NCT03989323 in clinicaltrial.gov) constitute the second historic cohort. This collected data for approximately 550 patients from the start of ICI treatment, irrespective of cancer type. Since August 2021, the study has included the QUALITOP quality of life questionnaires, demarcating the start of the prospective IMMUCARE BASE QUALITOP cohort. Earlier, in April 2021, the QoLD CART study began the prospective monitoring of HRQoL using the FACT-Lym for patients with diffuse large B-cell lymphoma receiving CAR T-cell therapy. Patients diagnosed with lymphoma who receive CAR T-cell therapy will be invited to a prospective QUALITOP cohort.

#### The Netherlands

We will include three historic and two prospective databases from the Netherlands. The OncoLifeS data biobank has collected data on clinical well-being and quality of life (assessed by EORTC-QLQ C30) since 2015 for patients with an oncological diagnosis treated in the University Medical Center Groningen.[29] Quality of life is monitored for 2 years after treatment and clinical outcomes are monitored continuously. We extracted additional data on irAEs for a historic cohort of approximately 500 patients with lung cancer who received ICIs and will use the same processes to collect the

1  
2  
3 prospective data. Amsterdam University Medical Centers will lead the data collection for patients  
4 treated with CAR T-cell therapy in the Netherlands from January 2020, using data from the  
5 nationwide 'Follow that CAR' biobank initiated by the Dutch National CAR-T Tumor Board. This  
6 biobank has prospectively monitored clinical outcomes and quality of life, using the FACT-Lym, for  
7 patients with diffuse large B-cell lymphoma treated with CAR T-cell therapy. The historic cohort  
8 comprises approximately 40 patients, and the same process will be used to collect the prospective  
9 data. Lastly, the eQuiPe study collected data on quality of life for patients with advanced cancers in  
10 the Netherlands and is linked to the Netherlands Cancer Registry. The data from this study are  
11 included as a historic cohort.  
12  
13  
14  
15  
16  
17  
18  
19  
20  
21  
22

### 23 Portugal

24 The Instituto Português de Oncologia in Lisboa invited patients diagnosed with lymphoma treated  
25 with CAR T-cell therapy or ICIs to participate in the prospective QUALITOP cohort from the end of  
26 2021 onwards. No historical patient data are available.  
27  
28  
29  
30  
31  
32

### 33 Spain

34 The Hospital Clinic of Barcelona has asked patients treated for melanoma to consent to the inclusion  
35 of their data in the "Xarxa de Melanoma de Catalunya" database since 2016. This database allows  
36 participating centres to investigate phenotypic, genetic and disease evolution in patients, using  
37 biomaterials, including DNA, stored in the "Colecció de la Unitat de melanoma" (IDIBAPS registry  
38 code: R120904-090, National ISCIII registry code: C.0000334). Since January 2020, they have  
39 collected data on clinical well-being and quality of life (assessed by EORTC-QLQ C30) for patients  
40 with melanoma treated with ICIs. We have included approximately 50 patients in a historical  
41 melanoma cohort and will use the same process for the prospective data collection.  
42  
43  
44  
45  
46  
47  
48  
49  
50  
51  
52  
53  
54  
55  
56  
57  
58  
59  
60

## Supplement 2: Overview of collected clinical data

All clinical data is manually extracted from patients electronic medical records. Data collected include, but are not limited to, the examples provided.

| Domain                            | Examples                                                                                                                                                                                                                                                                     |
|-----------------------------------|------------------------------------------------------------------------------------------------------------------------------------------------------------------------------------------------------------------------------------------------------------------------------|
| <b>Baseline</b>                   |                                                                                                                                                                                                                                                                              |
| Patient demographics              | Sex, month and year of birth, height                                                                                                                                                                                                                                         |
| Cancer diagnosis                  | Cancer type (ICD-10), date of diagnosis, current stage (TNM/Lugano)                                                                                                                                                                                                          |
| Past and current cancer treatment | Type of treatment (surgery, chemotherapy, targeted therapy, immunotherapy, radiotherapy), treatment line, start date, stop date, treatment medication, medication dose, number of cycles, best response, early treatment termination, reason for early treatment termination |
| Medical History                   | Relevant medical history (ICD-10) (e.g. cardiovascular diseases, neurological diseases, pulmonary diseases, diabetes, renal diseases, malignancies, auto-immune diseases), start date, end date                                                                              |
| Current medication                | medication type (according to Drug Ontology (DrOn)), start date                                                                                                                                                                                                              |
| <b>Continuous monitoring</b>      |                                                                                                                                                                                                                                                                              |
| Clinical examination              | Date of examination, weight, temperature, heart rate, systolic blood pressure, diastolic blood pressure, oxygen saturation, respiratory rate, ECOG performance status, response to treatment (RECIST/Lugano)                                                                 |
| Blood analyses                    | Date of examination, CRP, glucose, creatinine, troponine, ASAT, ALAT, LDH, albumin, protein, sodium, potassium, leucocytes, erythrocytes, thrombocytes, neutrophils, eosinophils, lymphocytes, haemoglobin, TSH, FT4, cortisol                                               |
| Adverse events                    | Adverse event type (CTCAE), adverse event grade (CTCAE), start date, end date, treatment                                                                                                                                                                                     |



STROBE Statement—Checklist of items that should be included in reports of *cohort studies*

|                           | Item No | Recommendation                                                                                                                                                                                    | Page    |
|---------------------------|---------|---------------------------------------------------------------------------------------------------------------------------------------------------------------------------------------------------|---------|
| <b>Title and abstract</b> | 1       | (a) Indicate the study's design with a commonly used term in the title or the abstract                                                                                                            | 1       |
|                           |         | (b) Provide in the abstract an informative and balanced summary of what was done and what was found                                                                                               | 3       |
| <b>Introduction</b>       |         |                                                                                                                                                                                                   |         |
| Background/rationale      | 2       | Explain the scientific background and rationale for the investigation being reported                                                                                                              | 6/7     |
| Objectives                | 3       | State specific objectives, including any prespecified hypotheses                                                                                                                                  | 7       |
| <b>Methods</b>            |         |                                                                                                                                                                                                   |         |
| Study design              | 4       | Present key elements of study design early in the paper                                                                                                                                           | 7/8     |
| Setting                   | 5       | Describe the setting, locations, and relevant dates, including periods of recruitment, exposure, follow-up, and data collection                                                                   | 7-16    |
| Participants              | 6       | (a) Give the eligibility criteria, and the sources and methods of selection of participants. Describe methods of follow-up                                                                        | 8       |
|                           |         | (b) For matched studies, give matching criteria and number of exposed and unexposed                                                                                                               | N.A.    |
| Variables                 | 7       | Clearly define all outcomes, exposures, predictors, potential confounders, and effect modifiers. Give diagnostic criteria, if applicable                                                          | 9,11-16 |
| Data sources/measurement  | 8*      | For each variable of interest, give sources of data and details of methods of assessment (measurement). Describe comparability of assessment methods if there is more than one group              | 11-16   |
| Bias                      | 9       | Describe any efforts to address potential sources of bias                                                                                                                                         | 8       |
| Study size                | 10      | Explain how the study size was arrived at                                                                                                                                                         | 8       |
| Quantitative variables    | 11      | Explain how quantitative variables were handled in the analyses. If applicable, describe which groupings were chosen and why                                                                      | N.A.    |
| Statistical methods       | 12      | (a) Describe all statistical methods, including those used to control for confounding                                                                                                             | 17-18   |
|                           |         | (b) Describe any methods used to examine subgroups and interactions                                                                                                                               | N.A.    |
|                           |         | (c) Explain how missing data were addressed                                                                                                                                                       | 17-18   |
|                           |         | (d) If applicable, explain how loss to follow-up was addressed                                                                                                                                    | N.A.    |
|                           |         | (e) Describe any sensitivity analyses                                                                                                                                                             | N.A.    |
| <b>Results</b>            |         |                                                                                                                                                                                                   |         |
| Participants              | 13*     | (a) Report numbers of individuals at each stage of study—eg numbers potentially eligible, examined for eligibility, confirmed eligible, included in the study, completing follow-up, and analysed | N.A.    |
|                           |         | (b) Give reasons for non-participation at each stage                                                                                                                                              | N.A.    |
|                           |         | (c) Consider use of a flow diagram                                                                                                                                                                | N.A.    |
| Descriptive data          | 14*     | (a) Give characteristics of study participants (eg demographic, clinical, social) and information on exposures and potential confounders                                                          | N.A.    |
|                           |         | (b) Indicate number of participants with missing data for each variable of interest                                                                                                               | N.A.    |
|                           |         | (c) Summarise follow-up time (eg, average and total amount)                                                                                                                                       | N.A.    |
| Outcome data              | 15*     | Report numbers of outcome events or summary measures over time                                                                                                                                    | N.A.    |
| Main results              | 16      | (a) Give unadjusted estimates and, if applicable, confounder-adjusted                                                                                                                             | N.A.    |

|                          |    |                                                                                                                                                                            |      |
|--------------------------|----|----------------------------------------------------------------------------------------------------------------------------------------------------------------------------|------|
|                          |    | estimates and their precision (eg, 95% confidence interval). Make clear which confounders were adjusted for and why they were included                                     |      |
|                          |    | (b) Report category boundaries when continuous variables were categorized                                                                                                  | N.A. |
|                          |    | (c) If relevant, consider translating estimates of relative risk into absolute risk for a meaningful time period                                                           | N.A. |
| Other analyses           | 17 | Report other analyses done—eg analyses of subgroups and interactions, and sensitivity analyses                                                                             | N.A. |
| <b>Discussion</b>        |    |                                                                                                                                                                            |      |
| Key results              | 18 | Summarise key results with reference to study objectives                                                                                                                   | N.A. |
| Limitations              | 19 | Discuss limitations of the study, taking into account sources of potential bias or imprecision. Discuss both direction and magnitude of any potential bias                 | N.A. |
| Interpretation           | 20 | Give a cautious overall interpretation of results considering objectives, limitations, multiplicity of analyses, results from similar studies, and other relevant evidence | N.A. |
| Generalisability         | 21 | Discuss the generalisability (external validity) of the study results                                                                                                      | N.A. |
| <b>Other information</b> |    |                                                                                                                                                                            |      |
| Funding                  | 22 | Give the source of funding and the role of the funders for the present study and, if applicable, for the original study on which the present article is based              | 24   |

\*Give information separately for exposed and unexposed groups.

**Note:** An Explanation and Elaboration article discusses each checklist item and gives methodological background and published examples of transparent reporting. The STROBE checklist is best used in conjunction with this article (freely available on the Web sites of PLoS Medicine at <http://www.plosmedicine.org/>, Annals of Internal Medicine at <http://www.annals.org/>, and Epidemiology at <http://www.epidem.com/>). Information on the STROBE Initiative is available at <http://www.strobe-statement.org>.
